# Supplementary material for: Cost-effectiveness of anatomical and functional test strategies for stable chest pain: public health perspective from a middle-income country
Source: PubMed Central journal article supplement — BMJ Open. 2017 May 4;7(4):e012652. doi: 10.1136/bmjopen-2016-012652 (PMC5623398; doi:10.1136/bmjopen-2016-012652), 2017-05-04

# BMJ Open

## Cost-effectiveness of Anatomic and Functional Test Strategies for Stable Chest Pain: Public Health Perspective from a Middle Income Country

|                                 |                                                                                                                                                                                                                                                                                                                                                                                                                                                                   |
|---------------------------------|-------------------------------------------------------------------------------------------------------------------------------------------------------------------------------------------------------------------------------------------------------------------------------------------------------------------------------------------------------------------------------------------------------------------------------------------------------------------|
| Journal:                        | <i>BMJ Open</i>                                                                                                                                                                                                                                                                                                                                                                                                                                                   |
| Manuscript ID                   | bmjopen-2016-012652                                                                                                                                                                                                                                                                                                                                                                                                                                               |
| Article Type:                   | Research                                                                                                                                                                                                                                                                                                                                                                                                                                                          |
| Date Submitted by the Author:   | 21-May-2016                                                                                                                                                                                                                                                                                                                                                                                                                                                       |
| Complete List of Authors:       | Bertoldi, Eduardo; Universidade Federal de Pelotas, Faculdade de Medicina Stella, Steffen; Institute of Health Technology Assessment (IATS/CNPq) Rohde, Luis Eduardo; Graduate Program in Cardiology, Universidade Federal do Rio Grande do Sul (UFRGS), Porto Alegre, Brazil. Polanczyk, Carisi; Institute of Health Technology Assessment (IATS/CNPq); Graduate Program in Cardiology, Universidade Federal do Rio Grande do Sul (UFRGS), Porto Alegre, Brazil. |
| <b>Primary Subject Heading</b>: | Health economics                                                                                                                                                                                                                                                                                                                                                                                                                                                  |
| Secondary Subject Heading:      | Cardiovascular medicine                                                                                                                                                                                                                                                                                                                                                                                                                                           |
| Keywords:                       | cost-benefit analysis, coronary disease, diagnosis, Cardiovascular imaging < RADIOLOGY & IMAGING                                                                                                                                                                                                                                                                                                                                                                  |
|                                 |                                                                                                                                                                                                                                                                                                                                                                                                                                                                   |

SCHOLARONE™  
Manuscripts

1  
2  
3 **Cost-effectiveness of Anatomic and Functional Test Strategies for Stable Chest**  
4  
5 **Pain: Public Health Perspective from a Middle Income Country**  
6  
7

8  
9 Eduardo Gehling Bertoldi, M.D., Sc.D.<sup>1,2,3</sup>; Steffan Frozi Stella, M.D., Sc.D.<sup>2,3</sup>; Luis  
10 Eduardo Paim Rohde, M.D., Sc.D.<sup>3</sup>; Carisi Anne Polanczyk, M.D., Sc.D.<sup>2,3</sup>.  
11  
12

- 13  
14  
15 1. Faculdade de Medicina, Universidade Federal de Pelotas (UFPel), Pelotas, Brazil.  
16  
17 2. Institute of Health Technology Assessment (IATS/CNPq), Porto Alegre, Brazil.  
18  
19 3. Graduate Program in Cardiology, Universidade Federal do Rio Grande do Sul  
20 (UFRGS), Porto Alegre, Brazil.  
21

22  
23 Correspondence and reprints:  
24

25 Eduardo Gehling Bertoldi, M.D., Sc.D.

26  
27 eduardo.bertoldi@ufpel.edu.br  
28

29 Faculdade de Medicina da Universidade Federal de Pelotas (UFPel)

30  
31 Av. Duque de Caxias, 250  
32

33 Pelotas / RS - Brasil 96030-001  
34

35 +55 (53) 3222-4957 / 9967-3063  
36  
37

38  
39 Word count: 4,759  
40  
41

42  
43  
44 Subject Codes:

45  
46 [100] Health policy and outcome research  
47

48 [124] Cardiovascular imaging agents/Techniques  
49  
50  
51  
52  
53  
54  
55  
56  
57  
58  
59  
60

## ABSTRACT

**Objectives.** To evaluate the relative cost-effectiveness of functional and anatomical strategies for diagnosing stable coronary artery disease (CAD), using exercise electrocardiogram (Ex-ECG), stress echocardiogram (ECHO), single-photon emission computed tomography (SPECT), coronary computed tomography angiography (CTA), or stress cardiac magnetic resonance (MRI).

**Setting.** Decision-analytic model, comparing strategies of sequential tests for evaluating patients with possible stable angina in low, intermediate and high pretest probability of CAD, from the perspective of a developing nation's public healthcare system.

**Participants.** Hypothetical cohort of patients with pretest probability of CAD between 20% and 70%.

**Primary and secondary outcome measures.** The primary outcome is cost per correct diagnosis of CAD. Proportion of false-positive or false-negative tests and number of unnecessary tests performed were also evaluated.

**Results.** Strategies using Ex-ECG as initial test were the least costly alternatives, but generated more frequent false-positive initial tests and false-negative final diagnosis. Strategies based on CTA or ECHO as initial test were the most attractive and resulted in similar cost-effectiveness ratios (I\$ 286 and I\$ 305 per correct diagnosis, respectively). A strategy based on C-MRI was highly effective for diagnosing stable CAD, but its high cost resulted in unfavorable ICERs in moderate- and high-risk scenarios. Noninvasive strategies based on SPECT have been dominated.

**Conclusions.** An anatomic diagnostic strategy based on CTA is a cost-effective option for CAD diagnosis. Functional strategies performed equally well when based on ECHO. C-MRI yielded acceptable ICER only at low pretest probability, and SPECT was not cost-effective in our analysis.

**Strengths and limitations of this study:**

- There is no evidence that diagnostic test selection impacts cardiovascular event rates in stable CAD, and economic results may help guide choice among tests.
- Our results show that incorporating coronary computed tomography into the Brazilian Public Health System would add a cost-effective option for CAD diagnosis.
- Among currently available technologies, the demonstration that stress echocardiography is more cost-effective than SPECT from this perspective may improve public resource allocation.
- Cost-effectiveness results are useful to establish the “standard” test for routine use, but flexibility in the choice among tests is still important, allowing physicians to select the best strategy for each particular case.

**Key Words:** cost-benefit analysis, coronary disease, diagnosis, cardiovascular imaging.

## INTRODUCTION

Proper evaluation and diagnosis of coronary artery disease (CAD) is an essential part of public health strategies, given the importance of CAD in worldwide morbidity and mortality [1]. When a patient presents with chest pain symptoms, his or her probability of having CAD can vary from less than 10% to more than 90%, depending on clinical and epidemiological characteristics [2]. In the frequent cases with intermediate pre-test probability, additional diagnostic tests can aid in clinical decision-making and risk stratification.

Nowadays, several noninvasive tests for diagnosing coronary artery disease are widely available, and have varying accuracy and costs. In Brazil, the Unified National Health System (SUS) currently reimburses exercise electrocardiography (Ex-ECG), stress echocardiography (ECHO), and nuclear stress testing (SPECT), but not coronary computed tomographic angiography (CTA) or stress cardiac magnetic resonance (MRI) [3].

Recommendations for diagnostic test selection are not uniform in current practice guidelines [2 4 5], and in many, if not most occasions, the choice among these tests is determined primarily by individual physician preference and/or local availability. This may overlook several other important factors, from the efficacy of each test for a given pretest probability, to economic issues such as added cost per diagnosis, when an inexpensive test such as Ex-ECG is systematically replaced by a more expensive, albeit more accurate test such as SPECT.

Recently published data from a large randomized trial shows that anatomical testing using CTA results in similar long-term event rates as functional testing with Ex-ECG, SPECT or ECHO [6]. These results should increment the importance of economic data in the decision-making process for test selection.

1  
2  
3 We aimed to compare the cost-effectiveness, measured as cost per correct diagnosis,  
4 of various functional and anatomical testing strategies for patients with suspected CAD.  
5  
6 This information can supplement efficacy data in decision-makers' choice of approved  
7  
8 exams for health plans, and provide grounds for the development of nationwide  
9  
10 protocols for the management of stable angina.  
11  
12  
13  
14  
15  
16  
17  
18  
19  
20  
21  
22  
23  
24  
25  
26  
27  
28  
29  
30  
31  
32  
33  
34  
35  
36  
37  
38  
39  
40  
41  
42  
43  
44  
45  
46  
47  
48  
49  
50  
51  
52  
53  
54  
55  
56  
57  
58  
59  
60

## METHODS

### Model

Decision-analytic model, comparing strategies for evaluating patients with possible stable angina, from the public health system's perspective; **Figure 1** schematically depicts the model structure. The model, developed in TreeAge Pro 2013 (Williamstown, MA; TreeAge Software, Inc.), considered a hypothetical cohort of patients with pretest probability of CAD between 20% and 70%.

We defined eight functional strategies and three anatomical strategies, based on clinically realistic sequences of tests (**Table 1**); in each strategy, the patient undergoes an initial test, moving on to further testing in case of positive or indeterminate results. Negative results do not generate additional tests. Strategy 1, for example, begins with Ex-ECG as a first test. Patients with positive or indeterminate results perform the second test, ECHO; if the second test is positive or indeterminate, patients move on to invasive coronary angiography (CA) as a final test. In scenarios with high pretest probability, we also considered strategies that use CA as first test, reserving noninvasive test for equivocal CA results, such as coronary lesions of unknown hemodynamic significance.

### Outcomes

The model ends with a test result (positive or negative), potentially true or false depending on the accuracy of the tests, resulting in final costs per correct diagnosis. There is also a small risk of death due to test-related adverse events (**Table 2**).

### Data sources

After systematic review of previous studies of accuracy, we used available data from published meta-analyses of test performance and risks to populate the model (**Table 2**).

1  
2  
3 Brazilian National Health System (Sistema Único de Saúde – SUS) 2013  
4  
5 reimbursement rates were the source of costs for diagnostic tests for currently  
6  
7 reimbursed tests [3]; costs of CTA and MRI were estimated based on rates for currently  
8  
9 reimbursed tests (chest computed tomography and rest cardiac magnetic resonance),  
10  
11 inflated proportionally to cost differences among these tests in the private sector [7]  
12  
13 **(Table 2).**

14  
15 All costs were converted from Brazilian Real to International Dollars (I\$), using the  
16  
17 World Bank's latest available purchasing power parity conversion factor of 1.89 [8].  
18  
19

### 20 **Assumptions**

21  
22 We assumed 100% sensitivity and specificity for coronary angiography, since it is the  
23  
24 gold standard for diagnosing coronary artery disease. Another assumption was that for  
25  
26 the last test in any strategy, whether it is CA (as in strategies 1-9) or a noninvasive test  
27  
28 (as in strategies 10-11), the probability of indeterminate results is zero.  
29  
30

31  
32 We assumed myocardial infarction (MI) as an example of serious investigation-related  
33  
34 complication, and applied SUS data regarding average national costs for MI  
35  
36 admissions in 2012, I\$ 1,670 [3], as reference for cost of complications (including  
37  
38 death).  
39

40  
41 Separate analyses were performed, with low (20%), medium (50%) and high (70%)  
42  
43 pretest probabilities of CAD, corresponding to the range of pretest probability in which  
44  
45 noninvasive tests are most useful, according to the American Heart Association's  
46  
47 guidelines on stable angina [2].  
48

### 49 **Sensitivity Analysis**

50  
51 Aiming to test the robustness of the model and the weight of individual parameters on  
52  
53 results, during sensitivity analysis, we varied test accuracies and rates of complications  
54  
55  
56  
57  
58  
59  
60



1  
2  
3 and indeterminacy around their 95% confidence intervals. Alternative costs of tests  
4  
5 ranged from half the original values to double those values.  
6

7  
8 In addition to one- and two-way sensitivity analyses, we performed probabilistic  
9  
10 sensitivity analysis (PSA) with 10,000 samples, with simultaneous variation of model  
11  
12 parameters around their confidence intervals. We used beta distributions for test  
13  
14 accuracies and gamma distributions for costs.  
15

16  
17 Additionally, taking into account that in some situations CA may be considered an  
18  
19 unacceptable first test due to patient or physician preferences, we considered an  
20  
21 alternative scenario excluding strategies that begin with CA (strategies 10 and 11).  
22

### 23 **Willingness-to-pay**

24  
25 There is no broadly accepted willingness-to-pay (WTP) threshold for additional costs  
26  
27 per correct diagnosis. For results per quality-adjusted life years, the World Health  
28  
29 Organization (WHO) recommends a WTP threshold between 1 and 3 times a nation's  
30  
31 gross domestic product (GDP) per capita for middle income countries [9]. For Brazil,  
32  
33 these figures are I\$ 11,700 to 35,200 per QALY.  
34  
35

36  
37 Since per-diagnosis results could be considered to be of a lower magnitude than per-  
38  
39 QALY results, we did not make any assumption regarding lower limit of WTP, but  
40  
41 rather chose to describe the main findings.  
42  
43  
44  
45  
46  
47  
48  
49  
50  
51  
52  
53  
54  
55  
56  
57  
58  
59  
60

## RESULTS

**Table 3** shows average costs, accuracy, and comparative cost-effectiveness results from testing a population with low (20%) to high (70%) pretest probability of CAD with each diagnostic strategy. In **Figure 2**, cost-effectiveness results for each pretest probability are illustrated, excluding dominated strategies.

### Low pretest probability (20%)

With low probability of CAD, strategy 2 (Ex-ECG -> CTA -> CA) was the least costly strategy, with a mean cost per diagnosis of I\$ 135, while retaining good overall performance (92.6% correct diagnosis, 5% invasive CA in patients without CAD). Upgrading to strategy 9 (CTA -> CA) increases effectiveness to 97.6% of correct diagnosis, with mean cost per diagnosis I\$ 200 and incremental cost-effectiveness ratio (ICER) of I\$ 1,420. Substituting strategy 9 with strategy 8 (C-MRI -> CA) modestly increases diagnostic accuracy to 97.9%, but raises mean cost per diagnosis to I\$ 320, resulting in a much higher ICER of I\$ 47,800.

The other strategies were either absolutely or relatively dominated. However, strategy 1 (Ex-ECG -> ECHO -> CA) had accuracy results that were practically identical to strategy 2 (92.4% correct diagnosis), with mean cost per diagnosis only marginally higher, I\$ 150.

### Moderate pretest probability (50%)

In moderate CAD probability scenario, strategy 2 (Ex-ECG -> CTA -> CA) remained the least costly strategy, at I\$ 230 per correct diagnosis; however, in this scenario, this strategy resulted in a relatively low overall accuracy of 81%, with over 18% false negative final diagnoses. Strategy 4 (Ex-ECG -> CA) improves overall accuracy to 86%, with 14% false negative results, and costs I\$ 240 per correct diagnosis. Resulting in an ICER versus strategy 2 of I\$ 415.

1  
2  
3 In this range of pretest probability, the strategy based on CTA coronary angiography as  
4 initial test (strategy 9) yields significantly better outcomes, with 94% overall accuracy.  
5  
6 Mean cost per diagnosis is I\$ 285, resulting in an ICER versus strategy 4 of I\$ 750 per  
7  
8 correct diagnosis. Strategy 8, based on C-MRI, raises accuracy to 95%, while  
9  
10 increasing mean cost per diagnosis to I\$ 410. ICER for strategy 8 versus strategy 9 is  
11  
12 I\$ 17,800 per correct diagnosis.  
13

14  
15 Remaining strategies have been dominated by strategies 2, 4, 9 and 10. Once again, it  
16  
17 should be noted that strategy 6 (Echo -> CA) yields accuracy results very close to the  
18  
19 ones obtained with strategy 9 (93.6%), at a marginally higher mean cost per diagnosis  
20  
21 of I\$ 305.  
22

### 23 24 **High pretest probability (70%)**

25  
26  
27 With a higher prevalence of CAD, strategies that involve two noninvasive tests before  
28  
29 CA are dominated by strategy 4 (Ex-ECG -> CA), which results in 80% correct  
30  
31 identification at I\$ 280 per diagnosis. However, in this range of CAD risk, strategy 4  
32  
33 results in 20% false negative results, seriously hindering its usefulness in practice.  
34

35  
36 If strategies with false negative rates above 20% (1-4) are excluded from analysis,  
37  
38 strategy 9 (CTA -> CA) emerges as an attractive option, with overall accuracy 92%,  
39  
40 and mean cost per diagnosis of I\$ 345. Strategy 6 (Echo -> CA) results in practically  
41  
42 identical effectiveness (91%) at a somewhat higher cost per diagnosis of I\$ 400.  
43

44  
45 A strategy based on invasive CA as first test (strategy 10) results in 98% accuracy,  
46  
47 mean cost per diagnosis I\$ 346, and ICER I\$ 273 versus strategy 9.  
48

### 49 **Sensitivity Analysis**

50  
51  
52 In one-way sensitivity analysis, the choice between CTA and ECHO-based strategies  
53  
54 was sensitive to procedure costs and test sensitivity. For instance, in low-probability  
55  
56 scenarios, CTA dominates ECHO if it costs less than I\$ 129, has higher cost and  
57  
58  
59  
60

1  
2  
3 higher effectiveness with costs between I\$ 129 and 182, and is extensively dominated  
4 by ECHO at higher costs. With high pretest probability, ECHO is the preferred  
5 noninvasive method if it costs up to I\$ 56; and at its maximum price, ECHO is  
6 dominated by CTA.  
7  
8  
9

10  
11 Variation in cost and accuracy of other tests modified cost per diagnosis for each  
12 strategy, but did not alter base-case results to the extent of changing preferred  
13 strategies.  
14  
15  
16

17  
18 In probabilistic sensitivity analysis, there was significant overlap between CTA and  
19 ECHO in terms of cost-effectiveness, demonstrating a high level of uncertainty as to  
20 which of the two strategies would be preferred (**Figure 3**).  
21  
22  
23

24  
25 In the alternative scenario that excludes CA as an initial test, even in the high pretest  
26 probability group, strategy 8, based on C-MRI as first test, becomes the strategy with  
27 highest accuracy, with an ICER versus strategy 9 (CTA -> CA) slightly above \$12,200  
28 with 70% pretest probability.  
29  
30  
31  
32

33  
34 Focusing on currently available imaging modalities, we performed two-way sensitivity  
35 analysis on the choice between ECHO-based and SPECT-based strategies, which  
36 showed ECHO-based strategies to be dominant across the defined spectrum of  
37 sensitivity analysis. SPECT-based strategies are preferred only if the cost of SPECT is  
38 no more than 10% higher than the cost of ECHO.  
39  
40  
41  
42  
43  
44  
45  
46  
47  
48  
49  
50  
51  
52  
53  
54  
55  
56  
57  
58  
59  
60

## DISCUSSION

Significant interest has been placed on the choice between functional and anatomical strategies for CAD diagnosis. In the management of acute coronary syndrome, CTA outperformed functional testing in three clinical trials [10-12]. However, in stable CAD, randomized data on the clinical impact of selecting a functional or anatomical strategy have only recently been published.

In the PROMISE trial [6], an anatomic strategy based on CTA as initial test resulted in similar clinical outcomes over 2 years, when compared to functional testing. The CTA strategy, probably due to its high sensitivity, resulted in a lower rate of invasive CA with no evidence of CAD in the first 90 days. Coronary revascularization was more frequent with CTA, but long-term clinical significance of this finding is uncertain.

This similar performance of anatomical and functional strategies should prompt physicians and decision-makers to look beyond clinical outcomes in the selection of tests, taking into account information such as cost-effectiveness, resource use, and environmental impact. Recent studies suggest CTA may be a cost-effective option in developed countries [13-15].

In this study, we performed a cost-effectiveness analysis to assess currently available strategies for investigating chest pain in Brazil, and to compare them with new ones, that could become available upon inclusion of CTA and C-MRI among reimbursed tests.

Our study showed that, from the economic perspective, choice of functional test (Ex-ECG, ECHO, SPECT or C-MRI) influences whether a functional or anatomical strategy would be preferable.

The least costly diagnostic strategies are conservative ones, using Ex-ECG as a “gatekeeper”, and proceeding to a second round of noninvasive tests when results are positive. These low-cost strategies have the disadvantage of generating a larger

1  
2  
3 number of false-positive initial tests, thus subjecting patients without CAD to additional  
4 tests. Furthermore, their performance deteriorates as pretest probability rises, so that  
5 at 70% pretest probability their false-negative rate is above 20%. Therefore, such  
6 strategies may be an option for constrained budgets or lack of alternatives, but only  
7 when pretest probability is low or moderate ( $\leq 50\%$ ).  
8  
9

10  
11  
12  
13 As pretest probability increased, costs per correct (positive or negative) diagnosis  
14 becomes higher for strategies based on sequential tests, since positive initial tests are  
15 more frequent, leading to further testing in more patients. This is particularly true for  
16 conservative strategies that require two noninvasive tests before proceeding to  
17 invasive CA. Strategies based on CTA and ECHO as initial test, result in almost  
18 superimposable cost-effectiveness results. These strategies would increase accuracy,  
19 at an ICER versus Ex-ECG-based strategies well below I\$ 11,909 per correct  
20 diagnosis. This makes them attractive options across the entire spectrum of pretest  
21 probabilities.  
22  
23  
24  
25  
26  
27  
28  
29  
30  
31

32 Diagnostic strategies based on C-MRI showed to be highly effective, but their relatively  
33 high (estimated) cost resulted in unfavorable ICERs in moderate- and high-risk  
34 scenarios. If C-MRI costs could be reduced to figures lower than I\$ 200 estimated, it  
35 could become cost-effective enough to recommend for widespread implementation in  
36 SUS. Nonetheless, it is important to emphasize that, for this cost, availability and  
37 acquisition values were not taken into account.  
38  
39  
40  
41  
42  
43  
44

45 Noninvasive strategies based on SPECT generated consistently unfavorable results,  
46 due to the high cost of SPECT when compared to other noninvasive tests, and have  
47 been dominated in all scenarios. In addition, radiation-related risks were not included in  
48 our short-term model because potential effects of radiation exposure take more than a  
49 decade to manifest. Still, this could be an additional cause for concern regarding  
50 widespread use of tests such as SPECT and CTA.  
51  
52  
53  
54  
55  
56  
57  
58  
59  
60

1  
2  
3 Our study's main limitation is that, since public health system does not reimburse CTA  
4 and C-MRI, we had to estimate procedure costs from private practice. In case of  
5 incorporation of these tests into the public system, actual reimbursement values may  
6 vary, although we did not expect significant discrepancy based on previous cases. Still,  
7 our results were robust even when we halved or doubled the value of our initial cost  
8 estimate.  
9  
10  
11  
12  
13

14  
15  
16 Current practice in Brazil usually prioritizes SPECT-based over ECHO-based strategies  
17 for diagnosing CAD. Based on the national database, in the year 2013, the Brazilian  
18 public health system reimbursed over 100,000 SPECT tests and less than 19,000  
19 ECHO tests for outpatients [3]. Our results suggest that ECHO-based strategies should  
20 be more widely employed in SUS, especially considering their absence of radiation and  
21 low costs for implementation and maintenance.  
22  
23  
24  
25  
26  
27

28  
29 Updating reimbursement values for ECHO may stimulate the availability of this test in  
30 the public health system, and seems justified, since our sensitivity analysis showed that  
31 ECHO would remain more cost-effective than SPECT even with costs up to 4 times  
32 higher than current rates.  
33  
34  
35  
36  
37  
38  
39  
40  
41  
42  
43  
44  
45  
46  
47  
48  
49  
50  
51  
52  
53  
54  
55  
56  
57  
58  
59  
60

## CONCLUSIONS

For the diagnosis of stable CAD, strategies based on exercise ECG are the least expensive, but their lower effectiveness means they are best suited for constrained budgets, and only when pretest probability is low or moderate.

Regarding technologies that are currently available in SUS, stress echocardiography is more cost-effective than SPECT, and should generally be preferred if available.

Incorporation of coronary computed tomography into SUS would add a cost-effective option for CAD diagnosis. Stress cardiac magnetic resonance yielded acceptable ICER only at low pretest probability. Our results suggest that the immediate incorporation of coronary computed tomography into SUS is advisable if actual test costs can match our estimated cost of I\$ 100 per test. Incorporation of stress cardiac MRI should be considered only if its costs can be reduced to values significantly lower than our estimate of I\$ 200.



**CONTRIBUTORSHIP STATEMENT**

EGB and CAP designed the study, with input from LEPR and SFS. EGB and SFS collected the data. EGB analyzed the data with input from all authors. All authors contributed to the interpretation of the results and write up for publication.

**COMPETING INTERESTS**

None.

**FUNDING**

This study was supported by the CNPq (MCT/MS), under the Program of the National Institute for Science and Technology (INCT) for Health Technology Assessment (IATS).

Prof Rohde and Prof. Polanczyk received research scholarship from CNPq.

**DATA SHARING STATEMENT**

No additional data are available.

**REFERENCES**

1. Global Burden of Disease Study 2013 Collaborators. Global, regional, and national incidence, prevalence, and years lived with disability for 301 acute and chronic diseases and injuries in 188 countries, 1990-2013: a systematic analysis for the Global Burden of Disease Study 2013. *Lancet* 2015;386(9995):743-800.
2. Fihn SD, Gardin JM, Abrams J, Berra K, Blankenship JC, Dallas AP, Douglas PS, Foody JM, Gerber TC, Hinderliter AL, King SB, 3rd, Kligfield PD, Krumholz HM, Kwong RY, Lim MJ, Linderbaum JA, Mack MJ, Munger MA, Prager RL, Sabik JF, Shaw LJ, Sikkema JD, Smith CR, Jr., Smith SC, Jr., Spertus JA, Williams SV, Anderson JL, American College of Cardiology Foundation/American Heart Association Task F. 2012 ACCF/AHA/ACP/AATS/PCNA/SCAI/STS guideline for the diagnosis and management of patients with stable ischemic heart disease: a report of the American College of Cardiology Foundation/American Heart Association task force on practice guidelines, and the American College of Physicians, American Association for Thoracic Surgery, Preventive Cardiovascular Nurses Association, Society for Cardiovascular Angiography and Interventions, and Society of Thoracic Surgeons. *Circulation* 2012;126:e354-471.
3. Ministério da Saúde do Brasil. DATASUS. 2013; Available from: <http://www.datasus.gov.br>.
4. Cooper A, Timmis A, Skinner J. Assessment of recent onset chest pain or discomfort of suspected cardiac origin: summary of NICE guidance. *BMJ* 2010;340:c1118.
5. Task Force Members, Montalescot G, Sechtem U, Achenbach S, Andreotti F, Arden C, Budaj A, Bugiardini R, Crea F, Cuisset T, Di Mario C, Ferreira JR, Gersh BJ, Gitt AK, Hulot JS, Marx N, Opie LH, Pfisterer M, Prescott E, Ruschitzka F, Sabate M, Senior R, Taggart DP, van der Wall EE, Vrints CJ, Guidelines

- 1  
2  
3 ESCCfP, Zamorano JL, Achenbach S, Baumgartner H, Bax JJ, Bueno H, Dean  
4 V, Deaton C, Erol C, Fagard R, Ferrari R, Hasdai D, Hoes AW, Kirchhof P,  
5 Knuuti J, Kolh P, Lancellotti P, Linhart A, Nihoyannopoulos P, Piepoli MF,  
6 Ponikowski P, Sirnes PA, Tamargo JL, Tendera M, Torbicki A, Wijns W,  
7 Windecker S, Document R, Knuuti J, Valgimigli M, Bueno H, Claeys MJ,  
8 Donner-Banzhoff N, Erol C, Frank H, Funck-Brentano C, Gaemperli O,  
9 Gonzalez-Juanatey JR, Hamilos M, Hasdai D, Husted S, James SK, Kervinen  
10 K, Kolh P, Kristensen SD, Lancellotti P, Maggioni AP, Piepoli MF, Pries AR,  
11 Romeo F, Ryden L, Simoons ML, Sirnes PA, Steg PG, Timmis A, Wijns W,  
12 Windecker S, Yildirim A, Zamorano JL. 2013 ESC guidelines on the  
13 management of stable coronary artery disease: the Task Force on the  
14 management of stable coronary artery disease of the European Society of  
15 Cardiology. *Eur Heart J* 2013;34:2949-3003.
- 16  
17  
18  
19  
20  
21  
22  
23  
24  
25  
26  
27  
28  
29  
30 6. Douglas PS, Hoffmann U, Patel MR, Mark DB, Al-Khalidi HR, Cavanaugh B, Cole J,  
31 Dolor RJ, Fordyce CB, Huang M, Khan MA, Kosinski AS, Krucoff MW, Malhotra  
32 V, Picard MH, Udelson JE, Velazquez EJ, Yow E, Cooper LS, Lee KL.  
33 Outcomes of Anatomical versus Functional Testing for Coronary Artery  
34 Disease. *N Engl J Med* 2015;372:1291-1300.
- 35  
36  
37  
38  
39  
40 7. Associação Médica Brasileira. Classificação Brasileira Hierarquizada de  
41 Procedimentos Médicos (CBHPM). São Paulo: Associação Médica Brasileira;  
42 2013. 206 p.
- 43  
44  
45  
46 8. World Bank. World Development Indicators & Global Development Finance. 2012;  
47 Available from: <http://databank.worldbank.org>.
- 48  
49  
50 9. WHO Commission on Macroeconomics and Health. Macroeconomics and health:  
51 investing in health for economic development. Report of the Commission on  
52 Macroeconomics and Health. Geneva: World Health Organization; 2001. 200  
53 p.  
54  
55  
56  
57  
58  
59  
60

- 1  
2  
3 10. Cury RC, Budoff M, Taylor AJ. Coronary CT angiography versus standard of care  
4 for assessment of chest pain in the emergency department. *J Cardiovasc*  
5 *Comput Tomogr* 2013; 7:79-82.  
6  
7  
8  
9 11. Hoffmann U, Truong QA, Schoenfeld DA, Chou ET, Woodard PK, Nagurney JT,  
10 Pope JH, Hauser TH, White CS, Weiner SG, Kalanjian S, Mullins ME, Mikati I,  
11 Peacock WF, Zakrotsky P, Hayden D, Goehler A, Lee H, Gazelle GS, Wiviott  
12 SD, Fleg JL, Udelson JE. Coronary CT angiography versus standard evaluation  
13 in acute chest pain. *N Engl J Med* 2012;367:299-308.  
14  
15  
16  
17  
18  
19 12. Goldstein JA, Chinnaiyan KM, Abidov A, Achenbach S, Berman DS, Hayes SW,  
20 Hoffmann U, Lesser JR, Mikati IA, O'Neil BJ, Shaw LJ, Shen MY, Valeti US,  
21 Raff GL, Investigators C-S. The CT-STAT (Coronary Computed Tomographic  
22 Angiography for Systematic Triage of Acute Chest Pain Patients to Treatment)  
23 trial. *J Am Coll Cardiol* 2011; 58:1414-22.  
24  
25  
26  
27  
28  
29 13. Genders TS, Petersen SE, Pugliese F, Dastidar AG, Fleischmann KE, Nieman K,  
30 et al. The Optimal Imaging Strategy for Patients With Stable Chest Pain: A  
31 Cost-Effectiveness Analysis. *Ann Intern Med.* 2015;162:474-484.  
32  
33  
34  
35  
36  
37  
38  
39 14. Nielsen LH, Olsen J, Markenvar J, Jensen JM, Nørgaard BL. Effects on costs of  
40 frontline diagnostic evaluation in patients suspected of angina: coronary  
41 computed tomography angiography vs. conventional ischaemia testing. *Eur*  
42 *Heart J Cardiovasc Imaging* 2013, 14 (5) 449-455; DOI: 10.1093/ehjci/jes166.  
43  
44  
45  
46 15. Zeb I, Abbas N, Nasir K, Budoff MJ. Coronary computed tomography as a  
47 cost-effective test strategy for coronary artery disease assessment – A  
48 systematic review. *Atherosclerosis* 2014;234:426-35. doi:  
49  
50  
51  
52  
53  
54 16. Mowatt G, Vale L, Brazzelli M, Hernandez R, Murray A, Scott N, Fraser C,  
55 McKenzie L, Gemmell H, Hillis G, Metcalfe M. Systematic review of the  
56 effectiveness and cost-effectiveness, and economic evaluation, of myocardial  
57  
58  
59  
60

- 1  
2  
3 perfusion scintigraphy for the diagnosis and management of angina and  
4 myocardial infarction. *Health technology assessment* 2004;8:iii-iv, 1-207.
- 5  
6  
7 17. Patterson RE, Eisner RL, Horowitz SF. Comparison of cost-effectiveness and utility  
8 of exercise ECG, single photon emission computed tomography, positron  
9 emission tomography, and coronary angiography for diagnosis of coronary  
10 artery disease. *Circulation* 1995;91:54-65.
- 11  
12  
13 18. Fleischmann KE, Hunink MG, Kuntz KM, Douglas PS. Exercise echocardiography  
14 or exercise SPECT imaging? A meta-analysis of diagnostic test performance.  
15 *JAMA* 1998;280:913-20.
- 16  
17  
18 19. Toronto Health Economics and Technology Assessment (THETA). Relative Cost-  
19 effectiveness of Five Non-invasive Cardiac Imaging Technologies for  
20 Diagnosing Coronary Artery Disease in Ontario. 2010. Available in  
21 [http://www.theta.utoronto.ca/papers/theta\_report\_007.pdf].
- 22  
23  
24 20. Arbab-Zadeh A, Miller JM, Rochitte CE, Dewey M, Niinuma H, Gottlieb I, Paul N,  
25 Clouse ME, Shapiro EP, Hoe J, Lardo AC, Bush DE, de Roos A, Cox C, Brinker  
26 J, Lima JA. Diagnostic accuracy of computed tomography coronary  
27 angiography according to pre-test probability of coronary artery disease and  
28 severity of coronary arterial calcification. The CORE-64 (Coronary Artery  
29 Evaluation Using 64-Row Multidetector Computed Tomography Angiography)  
30 International Multicenter Study. *J Am Coll Cardiol* 2012; 59:379-87.
- 31  
32  
33 21. Mowatt G, Cummins E, Waugh N, Walker S, Cook J, Jia X, Hillis GS, Fraser C.  
34 Systematic review of the clinical effectiveness and cost-effectiveness of 64-slice  
35 or higher computed tomography angiography as an alternative to invasive  
36 coronary angiography in the investigation of coronary artery disease. *Health*  
37 *technology assessment* 2008;12:iii-iv, ix-143.
- 38  
39  
40 22. Cooper A, Calvert N, Skinner J, Sawyer L, Sparrow K, Timmis A, Turnbull N,  
41 Cotterell M, Hill D, Adams P, Ashcroft J, Clark L, Coulden R, Hemingway H,  
42 James C, Jarman H, Kendall J, Lewis P, Patel K, Smeeth L, Taylor J. *Chest*
- 43  
44  
45  
46  
47  
48  
49  
50  
51  
52  
53  
54  
55  
56  
57  
58  
59  
60

1  
2  
3 Pain of Recent Onset: Assessment and Diagnosis of Recent Onset Chest Pain  
4 or Discomfort of Suspected Cardiac Origin. London: National Institute for Health  
5 and Clinical Excellence (NICE); 2010. 393 p.  
6  
7

8  
9 23. Hamon M, Fau G, Nee G, Ehtisham J, Morello R. Meta-analysis of the diagnostic  
10 performance of stress perfusion cardiovascular magnetic resonance for  
11 detection of coronary artery disease. J Cardiovasc Magn Reson 2010; 12:29.  
12  
13

14  
15 24. Patel MR, Peterson ED, Dai D, Brennan JM, Redberg RF, Anderson HV, Brindis  
16 RG, Douglas PS. Low diagnostic yield of elective coronary angiography. N Engl  
17 J Med 2010;362:886-95.  
18  
19  
20  
21  
22  
23  
24  
25  
26  
27  
28  
29  
30  
31  
32  
33  
34  
35  
36  
37  
38  
39  
40  
41  
42  
43  
44  
45  
46  
47  
48  
49  
50  
51  
52  
53  
54  
55  
56  
57  
58  
59  
60

## Figures and legends

**Figure 1.** Schematic representation of model structure.

**Figure 2.** Base-case cost-effectiveness results for predefined risk categories.

Strategies 1-4 excluded from high-probability analysis (see text for details).

Ex-ECG = exercise electrocardiogram; ECHO = stress echocardiogram; SPECT = single-photon emission computed tomography; CTA = computed tomography coronary angiogram; MRI = cardiac magnetic resonance; CA = invasive coronary angiography

**Figure 3.** Scatterplot of incremental cost-effectiveness of strategy 9 (CTA-CA) versus strategy 6 (ECHO-CA).

ECHO = stress echocardiogram; CTA = computed tomography coronary angiogram; CA = invasive coronary angiography. Dotted line represents willingness-to-pay threshold; ellipse contains 95% of outputs.

**Tables**

**Table 1.** Test sequence in each modeled strategy.

\* Strategies 10 and 11, in which invasive coronary angiography is the first test, are only considered in scenarios with high pretest probability.

SPECT = single-photon emission computed tomography; MRI = cardiac magnetic resonance.

**Table 2.** Characteristics of tests; range of values used in sensitivity analysis; and costs.

Ex-ECG = exercise electrocardiogram; ECHO = stress echocardiogram; SPECT = single-photon emission computed tomography; CTA = computed tomography coronary angiogram; MRI = cardiac magnetic resonance; CA = invasive coronary angiography

**Table 3.** Base-case results for different pretest probabilities. Dominated strategies not shown, except when significant uncertainty regarding dominance on sensitivity analysis.\*ICER vs. strategy 1; †ICER vs. strategy 9; ‡ICER vs. strategy 2; §ICER vs. strategy 4

C-E = cost-effectiveness; ICER = incremental cost-effectiveness ratio; FN = false-negative; Ex-ECG = exercise electrocardiogram; ECHO = stress echocardiogram; CTA = computed tomography coronary angiogram; MRI = cardiac magnetic resonance; CA = invasive coronary angiography



**Table 1. Test sequence in each modeled strategy.**

|                   | <b>1st test</b>         | <b>2nd test</b>            | <b>3rd test</b>      |
|-------------------|-------------------------|----------------------------|----------------------|
| <b>Strat. 1</b>   | exercise ECG            | stress<br>echocardiography | coronary angiography |
| <b>Strat. 2</b>   | exercise ECG            | coronary CT<br>angiography | coronary angiography |
| <b>Strat. 3</b>   | exercise ECG            | SPECT                      | coronary angiography |
| <b>Strat. 4</b>   | exercise ECG            | coronary angiography       |                      |
| <b>Strat. 5</b>   | SPECT                   | coronary angiography       |                      |
| <b>Strat. 6</b>   | stress echocardiography | coronary angiography       |                      |
| <b>Strat. 7</b>   | stress echocardiography | coronary CT<br>angiography | coronary angiography |
| <b>Strat. 8</b>   | stress cardiac MRI      | coronary angiography       |                      |
| <b>Strat. 9</b>   | coronary CT angiography | coronary angiography       |                      |
| <b>Strat. 10*</b> | coronary angiography    | stress echocardiography    |                      |
| <b>Strat. 11*</b> | coronary angiography    | SPECT                      |                      |

**Table 2. Characteristics of tests; range of values used in sensitivity analysis; and costs.**

| <b>Test</b>   | <b>Sensitivity<br/>(%) [range]</b> | <b>Specificity<br/>(%) [range]</b> | <b>Indeterm.<br/>(%)</b> | <b>Mortality<br/>(‰)</b> | <b>Cost<br/>(I\$)</b> | <b>Sources</b>       |
|---------------|------------------------------------|------------------------------------|--------------------------|--------------------------|-----------------------|----------------------|
| <b>Ex-ECG</b> | 65 [42 – 92]                       | 67 [43 – 83]                       | 18                       | 0.05                     | 16                    | [3 16 17]            |
| <b>ECHO</b>   | 85 [83 – 87]                       | 77 [74 – 80]                       | 15                       | 0.05                     | 87                    | [3 18 19]            |
| <b>SPECT</b>  | 87 [84 – 88]                       | 64 [60 – 76]                       | 6.9                      | 0.05                     | 419                   | [3 18 19]            |
| <b>CTA</b>    | 88 [83 – 92]                       | 87 [80 – 92]                       | 2                        | 0.01                     | 101                   | [3 20-22]            |
| <b>MRI</b>    | 89 [88 – 94]                       | 80 [75 – 87]                       | 5                        | 0.01                     | 200                   | [3 19 23]            |
| <b>CA</b>     | 100                                | 100                                | 10                       | 0.2                      | 325                   | Assumption, [3 4 24] |

Table 3. Base-case results for different pretest probabilities.

| Pretest Probability | Strategy                 | C-E<br>(!\$/diag) | ICER<br>(!\$/diag) | Accuracy (%) | FN (%) | Deaths (%) | Invasive<br>CA (%) | Negative<br>invasive<br>CA (%) |
|---------------------|--------------------------|-------------------|--------------------|--------------|--------|------------|--------------------|--------------------------------|
| LOW                 | 2 (Ex-ECG -> CTA -> CA)  | 135               | -                  | 93           | 7.4    | 0.009      | 18                 | 5                              |
|                     | 1 (Ex-ECG -> ECHO -> CA) | 153               | -                  | 92           | 7.6    | 0.012      | 25                 | 12                             |
|                     | 9 (CTA -> CA)            | 202               | 1,420*             | 98           | 2.4    | 0.007      | 29                 | 12                             |
|                     | 8 (C-MRI -> CA)          | 322               | 47,800†            | 98           | 2.1    | 0.008      | 37                 | 19                             |
|                     | 2 (Ex-ECG -> CTA -> CA)  | 231               | -                  | 81           | 18.5   | 0.013      | 35                 | 3                              |
| MODERATE            | 4 (Ex-ECG -> CA)         | 240               | 415‡               | 86           | 14.3   | 0.017      | 58                 | 23                             |
|                     | 9 (CTA -> CA)            | 286               | 750§               | 94           | 5.9    | 0.011      | 51                 | 7                              |
|                     | 6 (ECHO -> CA)           | 305               | -                  | 94           | 6.4    | 0.017      | 61                 | 17                             |
|                     | 8 (C-MRI -> CA)          | 407               | 17,800†            | 95           | 5.2    | 0.012      | 57                 | 12                             |
|                     | 4 (Ex-ECG -> CA)         | 278               | -                  | 80           | 20.1   | 0.018      | 63                 | 14                             |
| HIGH                | 9 (CTA -> CA)            | 345               | 790§               | 92           | 8.2    | 0.014      | 66                 | 4                              |
|                     | 6 (ECHO -> CA)           | 351               | -                  | 91           | 8.9    | 0.019      | 71                 | 10                             |
|                     | 10 (CA -> ECHO)          | 381               | 273†               | 98           | 1.7    | 0.02       | 100                | 30                             |

1  
2  
3  
4  
5  
6  
7  
8  
9  
10  
11  
12  
13  
14  
15  
16  
17  
18  
19  
20  
21  
22  
23  
24  
25  
26  
27  
28  
29  
30  
31  
32  
33  
34  
35  
36  
37  
38  
39  
40  
41  
42  
43  
44  
45  
46  
47  
48  
49  
50  
51  
52  
53  
54  
55  
56  
57  
58  
59  
60

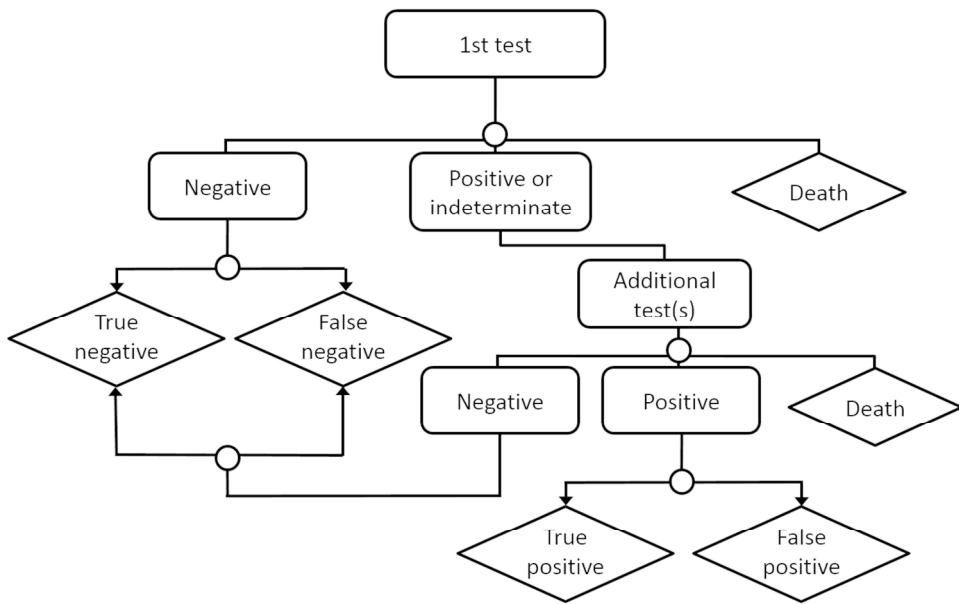

Figure 1. Schematic representation of model structure.

199x127mm (300 x 300 DPI)

Review only

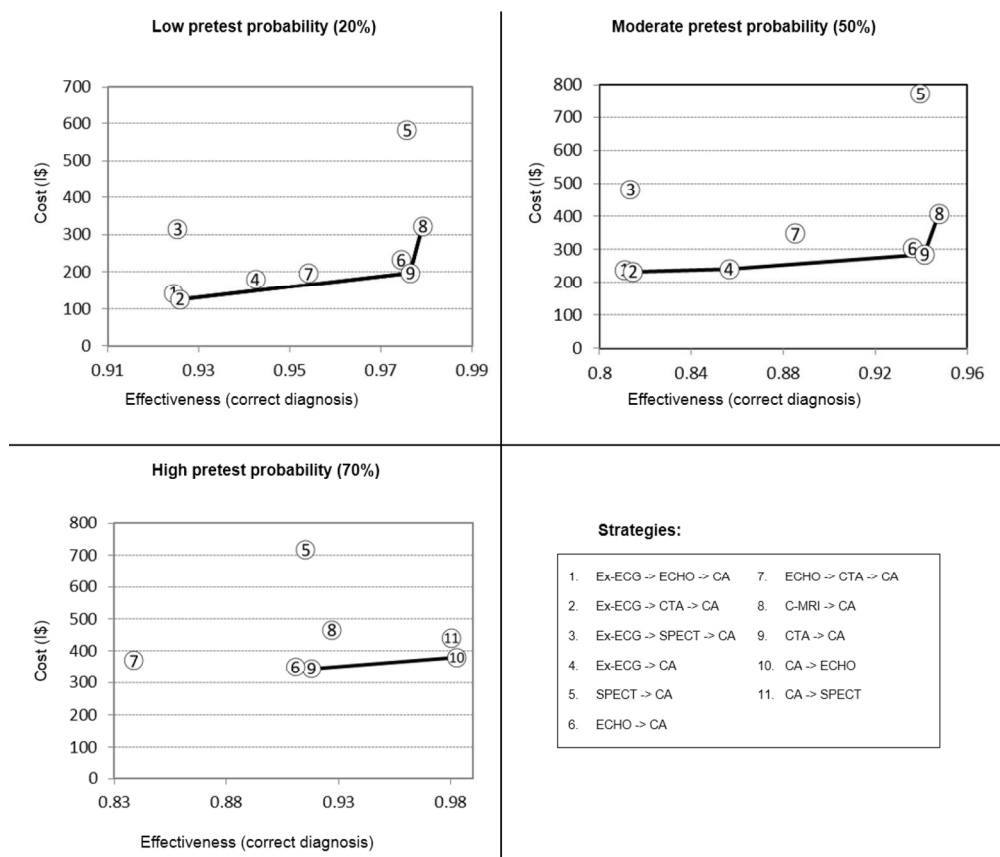

Figure 2. Base-case cost-effectiveness results for predefined risk categories. Strategies 1-4 excluded from high-probability analysis (see text for details).  
 Ex-ECG = exercise electrocardiogram; ECHO = stress echocardiogram; SPECT = single-photon emission computed tomography; CTA = computed tomography coronary angiogram; MRI = cardiac magnetic resonance; CA = invasive coronary angiography

199x172mm (300 x 300 DPI)

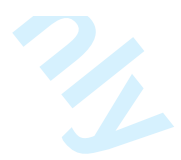

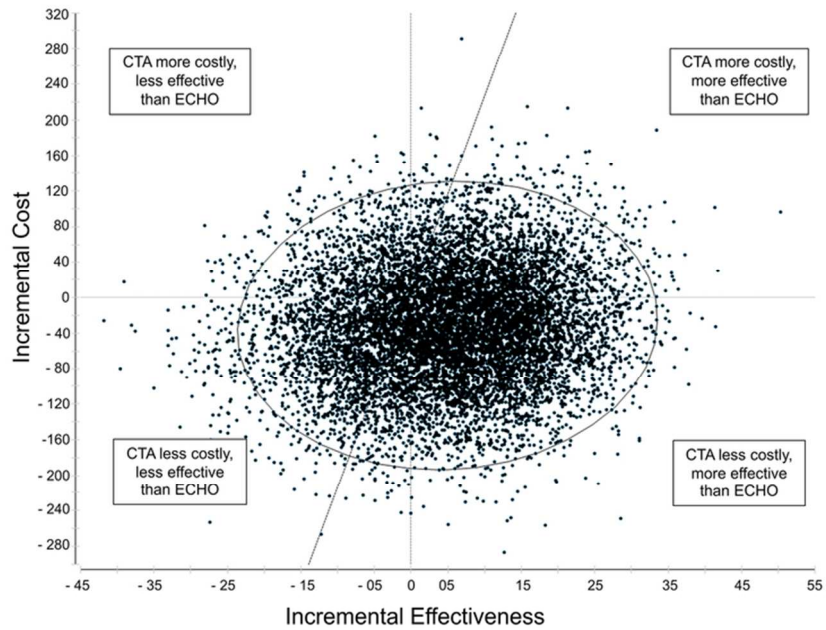

Figure 3. Scatterplot of incremental cost-effectiveness of strategy 9 (CTA-CA) versus strategy 6 (ECHO-CA).

ECHO = stress echocardiogram; CTA = computed tomography coronary angiogram; CA = invasive coronary angiography. Dotted line represents willingness-to-pay threshold; ellipse contains 95% of outputs.

75x56mm (300 x 300 DPI)

**CHEERS Checklist****Items to include when reporting economic evaluations of health interventions**

The **ISPOR CHEERS Task Force Report**, *Consolidated Health Economic Evaluation Reporting Standards (CHEERS)—Explanation and Elaboration: A Report of the ISPOR Health Economic Evaluations Publication Guidelines Good Reporting Practices Task Force*, provides examples and further discussion of the 24-item CHEERS Checklist and the CHEERS Statement. It may be accessed via the *Value in Health* or via the ISPOR Health Economic Evaluation Publication Guidelines – CHEERS: Good Reporting Practices webpage: <http://www.ispor.org/TaskForces/EconomicPubGuidelines.asp>

| Section/item                    | Item No | Recommendation                                                                                                                                                                             | Reported on page No/line No |
|---------------------------------|---------|--------------------------------------------------------------------------------------------------------------------------------------------------------------------------------------------|-----------------------------|
| <b>Title and abstract</b>       |         |                                                                                                                                                                                            |                             |
| Title                           | 1       | Identify the study as an economic evaluation or use more specific terms such as “cost-effectiveness analysis”, and describe the interventions compared.                                    | 1 / 1                       |
| Abstract                        | 2       | Provide a structured summary of objectives, perspective, setting, methods (including study design and inputs), results (including base case and uncertainty analyses), and conclusions.    | 2 / 1                       |
| <b>Introduction</b>             |         |                                                                                                                                                                                            |                             |
| Background and objectives       | 3       | Provide an explicit statement of the broader context for the study.<br>Present the study question and its relevance for health policy or practice decisions.                               | 4                           |
| <b>Methods</b>                  |         |                                                                                                                                                                                            |                             |
| Target population and subgroups | 4       | Describe characteristics of the base case population and subgroups analysed, including why they were chosen.                                                                               | 6                           |
| Setting and location            | 5       | State relevant aspects of the system(s) in which the decision(s) need(s) to be made.                                                                                                       | 8                           |
| Study perspective               | 6       | Describe the perspective of the study and relate this to the costs being evaluated.                                                                                                        | 6                           |
| Comparators                     | 7       | Describe the interventions or strategies being compared and state why they were chosen.                                                                                                    | 6                           |
| Time horizon                    | 8       | State the time horizon(s) over which costs and consequences are being evaluated and say why appropriate.                                                                                   | 6                           |
| Discount rate                   | 9       | Report the choice of discount rate(s) used for costs and outcomes and say why appropriate.                                                                                                 | N/A                         |
| Choice of health outcomes       | 10      | Describe what outcomes were used as the measure(s) of benefit in the evaluation and their relevance for the type of analysis performed.                                                    | 8                           |
| Measurement of effectiveness    | 11a     | <i>Single study-based estimates:</i> Describe fully the design features of the single effectiveness study and why the single study was a sufficient source of clinical effectiveness data. | N/A                         |

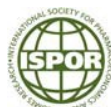

1  
2  
3  
4  
5  
6  
7  
8  
9  
10  
11  
12  
13  
14  
15  
16  
17  
18  
19  
20  
21  
22  
23  
24  
25  
26  
27  
28  
29  
30  
31  
32  
33  
34  
35  
36  
37  
38  
39  
40  
41  
42  
43  
44  
45  
46  
47  
48  
49  
50  
51  
52  
53  
54  
55  
56  
57  
58  
59  
60

|                                                        |     |                                                                                                                                                                                                                                                                                                                                                       |             |
|--------------------------------------------------------|-----|-------------------------------------------------------------------------------------------------------------------------------------------------------------------------------------------------------------------------------------------------------------------------------------------------------------------------------------------------------|-------------|
|                                                        | 11b | <i>Synthesis-based estimates</i> : Describe fully the methods used for identification of included studies and synthesis of clinical effectiveness data.                                                                                                                                                                                               | 8           |
| Measurement and valuation of preference based outcomes | 12  | If applicable, describe the population and methods used to elicit preferences for outcomes.                                                                                                                                                                                                                                                           | N/A         |
| Estimating resources and costs                         | 13a | <i>Single study-based economic evaluation</i> : Describe approaches used to estimate resource use associated with the alternative interventions. Describe primary or secondary research methods for valuing each resource item in terms of its unit cost. Describe any adjustments made to approximate to opportunity costs.                          | N/A         |
|                                                        | 13b | <i>Model-based economic evaluation</i> : Describe approaches and data sources used to estimate resource use associated with model health states. Describe primary or secondary research methods for valuing each resource item in terms of its unit cost. Describe any adjustments made to approximate to opportunity costs.                          | 8           |
| Currency, price date, and conversion                   | 14  | Report the dates of the estimated resource quantities and unit costs. Describe methods for adjusting estimated unit costs to the year of reported costs if necessary. Describe methods for converting costs into a common currency base and the exchange rate.                                                                                        | 8           |
| Choice of model                                        | 15  | Describe and give reasons for the specific type of decision-analytical model used. Providing a figure to show model structure is strongly recommended.                                                                                                                                                                                                | p.5 / fig.1 |
| Assumptions                                            | 16  | Describe all structural or other assumptions underpinning the decision-analytical model.                                                                                                                                                                                                                                                              | 10          |
| Analytical methods                                     | 17  | Describe all analytical methods supporting the evaluation. This could include methods for dealing with skewed, missing, or censored data; extrapolation methods; methods for pooling data; approaches to validate or make adjustments (such as half cycle corrections) to a model; and methods for handling population heterogeneity and uncertainty. | 10          |
| <b>Results</b>                                         |     |                                                                                                                                                                                                                                                                                                                                                       |             |
| Study parameters                                       | 18  | Report the values, ranges, references, and, if used, probability distributions for all parameters. Report reasons or sources for distributions used to represent uncertainty where appropriate. Providing a table to show the input values is strongly recommended.                                                                                   | Table 2     |
| Incremental costs and outcomes                         | 19  | For each intervention, report mean values for the main categories of estimated costs and outcomes of interest, as well as mean differences between the comparator groups. If applicable, report incremental cost-effectiveness ratios.                                                                                                                | Table 3     |
| Characterising uncertainty                             | 20a | <i>Single study-based economic evaluation</i> : Describe the effects of sampling uncertainty for the estimated incremental cost and incremental effectiveness parameters, together with the impact                                                                                                                                                    | N/A         |

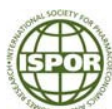



|                                                                      |     |                                                                                                                                                                                                                                                                            |                  |
|----------------------------------------------------------------------|-----|----------------------------------------------------------------------------------------------------------------------------------------------------------------------------------------------------------------------------------------------------------------------------|------------------|
|                                                                      |     | of methodological assumptions (such as discount rate, study perspective).                                                                                                                                                                                                  |                  |
|                                                                      | 20b | <i>Model-based economic evaluation:</i> Describe the effects on the results of uncertainty for all input parameters, and uncertainty related to the structure of the model and assumptions.                                                                                | <u>pp. 15-16</u> |
| Characterising heterogeneity                                         | 21  | If applicable, report differences in costs, outcomes, or cost-effectiveness that can be explained by variations between subgroups of patients with different baseline characteristics or other observed variability in effects that are not reducible by more information. | <u>pp. 15-16</u> |
| <b>Discussion</b>                                                    |     |                                                                                                                                                                                                                                                                            |                  |
| Study findings, limitations, generalisability, and current knowledge | 22  | Summarise key study findings and describe how they support the conclusions reached. Discuss limitations and the generalisability of the findings and how the findings fit with current knowledge.                                                                          | <u>pp. 17-19</u> |
| <b>Other</b>                                                         |     |                                                                                                                                                                                                                                                                            |                  |
| Source of funding                                                    | 23  | Describe how the study was funded and the role of the funder in the identification, design, conduct, and reporting of the analysis. Describe other non-monetary sources of support.                                                                                        | <u>20</u>        |
| Conflicts of interest                                                | 24  | Describe any potential for conflict of interest of study contributors in accordance with journal policy. In the absence of a journal policy, we recommend authors comply with International Committee of Medical Journal Editors recommendations.                          | <u>20</u>        |

For consistency, the CHEERS Statement checklist format is based on the format of the CONSORT statement checklist

The **ISPOR CHEERS Task Force Report** provides examples and further discussion of the 24-item CHEERS Checklist and the CHEERS Statement. It may be accessed via the *Value in Health* link or via the ISPOR Health Economic Evaluation Publication Guidelines – CHEERS: Good Reporting Practices webpage: <http://www.ispor.org/TaskForces/EconomicPubGuidelines.asp>

The citation for the CHEERS Task Force Report is:  
 Husereau D, Drummond M, Petrou S, et al. Consolidated health economic evaluation reporting standards (CHEERS)—Explanation and elaboration: A report of the ISPOR health economic evaluations publication guidelines good reporting practices task force. *Value Health* 2013;16:231-50.

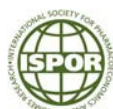

# BMJ Open

## Cost-effectiveness of Anatomic and Functional Test Strategies for Stable Chest Pain: Public Health Perspective from a Middle Income Country

|                                 |                                                                                                                                                                                                                                                                                                                                                                                                                                                                   |
|---------------------------------|-------------------------------------------------------------------------------------------------------------------------------------------------------------------------------------------------------------------------------------------------------------------------------------------------------------------------------------------------------------------------------------------------------------------------------------------------------------------|
| Journal:                        | <i>BMJ Open</i>                                                                                                                                                                                                                                                                                                                                                                                                                                                   |
| Manuscript ID                   | bmjopen-2016-012652.R1                                                                                                                                                                                                                                                                                                                                                                                                                                            |
| Article Type:                   | Research                                                                                                                                                                                                                                                                                                                                                                                                                                                          |
| Date Submitted by the Author:   | 21-Sep-2016                                                                                                                                                                                                                                                                                                                                                                                                                                                       |
| Complete List of Authors:       | Bertoldi, Eduardo; Universidade Federal de Pelotas, Faculdade de Medicina Stella, Steffen; Institute of Health Technology Assessment (IATS/CNPq) Rohde, Luis Eduardo; Graduate Program in Cardiology, Universidade Federal do Rio Grande do Sul (UFRGS), Porto Alegre, Brazil. Polanczyk, Carisi; Institute of Health Technology Assessment (IATS/CNPq); Graduate Program in Cardiology, Universidade Federal do Rio Grande do Sul (UFRGS), Porto Alegre, Brazil. |
| <b>Primary Subject Heading</b>: | Health economics                                                                                                                                                                                                                                                                                                                                                                                                                                                  |
| Secondary Subject Heading:      | Cardiovascular medicine                                                                                                                                                                                                                                                                                                                                                                                                                                           |
| Keywords:                       | cost-benefit analysis, coronary disease, diagnosis, Cardiovascular imaging < RADIOLOGY & IMAGING                                                                                                                                                                                                                                                                                                                                                                  |
|                                 |                                                                                                                                                                                                                                                                                                                                                                                                                                                                   |

SCHOLARONE™  
Manuscripts

**Cost-effectiveness of Anatomic and Functional Test Strategies for Stable Chest  
Pain: Public Health Perspective from a Middle Income Country**

Eduardo Gehling Bertoldi, M.D., Sc.D.<sup>1,2,3</sup>; Steffan Frozi Stella, M.D., Sc.D.<sup>2,3</sup>; Luis  
Eduardo Paim Rohde, M.D., Sc.D.<sup>3</sup>; Carisi Anne Polanczyk, M.D., Sc.D.<sup>2,3</sup>.

1. Faculdade de Medicina, Universidade Federal de Pelotas (UFPel), Pelotas, Brazil.
2. Institute of Health Technology Assessment (IATS/CNPq), Porto Alegre, Brazil.
3. Graduate Program in Cardiology, Universidade Federal do Rio Grande do Sul (UFRGS), Porto Alegre, Brazil.

Correspondence and reprints:

Eduardo Gehling Bertoldi, M.D., Sc.D.

eduardo.bertoldi@ufpel.edu.br

Faculdade de Medicina da Universidade Federal de Pelotas (UFPel)

Av. Duque de Caxias, 250

Pelotas / RS - Brasil 96030-001

+55 (53) 3222-4957 / 9967-3063

Word count: 4,759

Subject Codes:

[100] Health policy and outcome research

[124] Cardiovascular imaging agents/Techniques

## ABSTRACT

**Objectives.** To evaluate the relative cost-effectiveness of functional and anatomical strategies for diagnosing stable coronary artery disease (CAD), using exercise electrocardiogram (Ex-ECG), stress echocardiogram (ECHO), single-photon emission computed tomography (SPECT), coronary computed tomography angiography (CTA), or stress cardiac magnetic resonance (MRI).

**Setting.** Decision-analytic model, comparing strategies of sequential tests for evaluating patients with possible stable angina in low, intermediate and high pretest probability of CAD, from the perspective of a developing nation's public healthcare system.

**Participants.** Hypothetical cohort of patients with pretest probability of CAD between 20% and 70%.

**Primary and secondary outcome measures.** The primary outcome is cost per correct diagnosis of CAD. Proportion of false-positive or false-negative tests and number of unnecessary tests performed were also evaluated.

**Results.** Strategies using Ex-ECG as initial test were the least costly alternatives, but generated more frequent false-positive initial tests and false-negative final diagnosis. Strategies based on CTA or ECHO as initial test were the most attractive and resulted in similar cost-effectiveness ratios (I\$ 286 and I\$ 305 per correct diagnosis, respectively). A strategy based on C-MRI was highly effective for diagnosing stable CAD, but its high cost resulted in unfavorable ICERs in moderate- and high-risk scenarios. Noninvasive strategies based on SPECT have been dominated.

**Conclusions.** An anatomic diagnostic strategy based on CTA is a cost-effective option for CAD diagnosis. Functional strategies performed equally well when based on ECHO. C-MRI yielded acceptable ICER only at low pretest probability, and SPECT was not cost-effective in our analysis.

**Strengths and limitations of this study:**

- There is no evidence that diagnostic test selection impacts cardiovascular event rates in stable CAD, and economic results may help guide choice among tests.
- Our results show that incorporating coronary computed tomography into the Brazilian Public Health System would add a cost-effective option for CAD diagnosis.
- Among currently available technologies, the demonstration that stress echocardiography is more cost-effective than SPECT from this perspective may improve public resource allocation.
- Cost-effectiveness results are useful to establish the “standard” test for routine use, but flexibility in the choice among tests is still important, allowing physicians to select the best strategy for each particular case.

**Key Words:** cost-benefit analysis, coronary disease, diagnosis, cardiovascular imaging.

## INTRODUCTION

Proper evaluation and diagnosis of coronary artery disease (CAD) is an essential part of public health strategies, given the importance of CAD in worldwide morbidity and mortality [1]. When a patient presents with chest pain symptoms, his or her probability of having CAD can vary from less than 10% to more than 90%, depending on clinical and epidemiological characteristics [2]. In the frequent cases with intermediate pre-test probability, additional diagnostic tests can aid in clinical decision-making and risk stratification.

Nowadays, several noninvasive tests for diagnosing coronary artery disease are widely available, and have varying accuracy and costs. In Brazil, the Unified National Health System (SUS) currently reimburses exercise electrocardiography (Ex-ECG), stress echocardiography (ECHO), and nuclear stress testing (SPECT), but not coronary computed tomographic angiography (CTA) or stress cardiac magnetic resonance (MRI) [3].

Recommendations for diagnostic test selection are not uniform in current practice guidelines [2 4 5], and in many, if not most occasions, the choice among these tests is determined primarily by individual physician preference and/or local availability. This may overlook several other important factors, from the efficacy of each test for a given pretest probability, to economic issues such as added cost per diagnosis, when an inexpensive test such as Ex-ECG is systematically replaced by a more expensive, albeit more accurate test such as SPECT.

Recently published data from a large randomized trial shows that anatomical testing using CTA results in similar long-term event rates as functional testing with Ex-ECG, SPECT or ECHO [6]. These results should increment the importance of economic data in the decision-making process for test selection.

1  
2  
3 We aimed to compare the cost-effectiveness, measured as cost per correct diagnosis,  
4 of various functional and anatomical testing strategies for patients with suspected CAD.  
5  
6 This information can supplement efficacy data in decision-makers' choice of approved  
7  
8 exams for health plans, and provide grounds for the development of nationwide  
9  
10 protocols for the management of stable angina.  
11  
12  
13  
14  
15  
16  
17  
18  
19  
20  
21  
22  
23  
24  
25  
26  
27  
28  
29  
30  
31  
32  
33  
34  
35  
36  
37  
38  
39  
40  
41  
42  
43  
44  
45  
46  
47  
48  
49  
50  
51  
52  
53  
54  
55  
56  
57  
58  
59  
60

## METHODS

### Model

Decision-analytic model, comparing strategies for evaluating patients with possible stable angina, from the public health system's perspective; **Figure 1** schematically depicts the model structure; a more detailed, technical depiction of model structure is available online in **Supplemental Figure A**. The model, developed in TreeAge Pro 2013 (Williamstown, MA; TreeAge Software, Inc.), considered a hypothetical cohort of patients with pretest probability of CAD between 20% and 70%.

We defined eight functional strategies and three anatomical strategies, based on clinically realistic sequences of tests (**Table 1**); in each strategy, the patient undergoes an initial test, moving on to further testing in case of positive or indeterminate results. Negative results do not generate additional tests. Strategy 1, for example, begins with Ex-ECG as a first test. Patients with positive or indeterminate results perform the second test, ECHO; if the second test is positive or indeterminate, patients move on to invasive coronary angiography (CA) as a final test. In scenarios with high pretest probability, we also considered strategies that use CA as first test, reserving noninvasive test for equivocal CA results, such as coronary lesions of unknown hemodynamic significance.

### Outcomes

The model ends with a test result (positive or negative), potentially true or false depending on the accuracy of the tests, resulting in final costs per correct diagnosis. There is also a small risk of death due to test-related adverse events (**Table 2**).

### Data sources



1  
2  
3 After systematic review of previous studies of accuracy, we used available data from  
4 published meta-analyses of test performance and risks to populate the model (**Table**  
5  
6  
7 **2**).

8  
9 Brazilian National Health System (Sistema Único de Saúde – SUS) 2013  
10 reimbursement rates were the source of costs for diagnostic tests for currently  
11 reimbursed tests [3]; costs of CTA and MRI were estimated based on rates for currently  
12 reimbursed tests (chest computed tomography and rest cardiac magnetic resonance),  
13 inflated proportionally to cost differences among these tests in the private sector [7]  
14  
15  
16  
17  
18  
19  
20 (**Table 2**).

21  
22 All costs were converted from Brazilian Real to International Dollars (I\$), using the  
23 World Bank's latest available purchasing power parity conversion factor of 1.89 [8].  
24  
25

### 26 27 **Assumptions**

28  
29 We assumed 100% sensitivity and specificity for coronary angiography, since it is the  
30 gold standard for diagnosing coronary artery disease. Another assumption was that for  
31 the last test in any strategy, whether it is CA (as in strategies 1-9) or a noninvasive test  
32 (as in strategies 10-11), the probability of indeterminate results is zero.  
33  
34  
35

36  
37 We assumed myocardial infarction (MI) as an example of serious investigation-related  
38 complication, and applied SUS data regarding average national costs for MI  
39 admissions in 2012, I\$ 1,670 [3], as reference for cost of complications (including  
40 death).  
41  
42  
43  
44  
45

46  
47 Separate analyses were performed, with low (20%), medium (50%) and high (70%)  
48 pretest probabilities of CAD, corresponding to the range of pretest probability in which  
49 noninvasive tests are most useful, according to the American Heart Association's  
50 guidelines on stable angina [2].  
51  
52  
53  
54

### 55 56 **Sensitivity Analysis**

1  
2  
3 Aiming to test the robustness of the model and the weight of individual parameters on  
4 results, during sensitivity analysis, we varied test accuracies and rates of complications  
5 and indeterminacy around their 95% confidence intervals. Alternative costs of tests  
6 ranged from half the original values to double those values.  
7  
8  
9

10  
11 In addition to one- and two-way sensitivity analyses, we performed probabilistic  
12 sensitivity analysis (PSA) with 10,000 samples, with simultaneous variation of model  
13 parameters around their confidence intervals. We used beta distributions for test  
14 accuracies and gamma distributions for costs.  
15  
16  
17  
18

19  
20 Additionally, taking into account that in some situations CA may be considered an  
21 unacceptable first test due to patient or physician preferences, we considered an  
22 alternative scenario excluding strategies that begin with CA (strategies 10 and 11).  
23  
24  
25  
26

### 27 **Willingness-to-pay**

28  
29 There is no broadly accepted willingness-to-pay (WTP) threshold for additional costs  
30 per correct diagnosis. For results per quality-adjusted life years, the World Health  
31 Organization (WHO) recommends a WTP threshold between 1 and 3 times a nation's  
32 gross domestic product (GDP) per capita for middle income countries [9]. For Brazil,  
33 these figures are I\$ 11,700 to 35,200 per QALY.  
34  
35  
36  
37  
38  
39

40 Since per-diagnosis results could be considered to be of a lower magnitude than per-  
41 QALY results, we did not make any assumption regarding lower limit of WTP, but  
42 rather chose to describe the main findings.  
43  
44  
45  
46  
47  
48  
49  
50  
51  
52  
53  
54  
55  
56  
57  
58  
59  
60

## RESULTS

**Table 3** shows average costs, accuracy, and comparative cost-effectiveness results from testing a population with low (20%) to high (70%) pretest probability of CAD with each diagnostic strategy. In **Figure 2**, cost-effectiveness results for each pretest probability are illustrated, excluding dominated strategies.

### Low pretest probability (20%)

With low probability of CAD, strategy 2 (Ex-ECG → CTA → CA) was the least costly strategy, with a mean cost per diagnosis of I\$ 135, while retaining good overall performance (92.6% correct diagnosis, 5% invasive CA in patients without CAD). Upgrading to strategy 9 (CTA → CA) increases effectiveness to 97.6% of correct diagnosis, with mean cost per diagnosis I\$ 200 and incremental cost-effectiveness ratio (ICER) of I\$ 1,420. Substituting strategy 9 with strategy 8 (C-MRI → CA) modestly increases diagnostic accuracy to 97.9%, but raises mean cost per diagnosis to I\$ 320, resulting in a much higher ICER of I\$ 47,800.

The other strategies were either absolutely or relatively dominated. However, strategy 1 (Ex-ECG → ECHO → CA) had accuracy results that were practically identical to strategy 2 (92.4% correct diagnosis), with mean cost per diagnosis only marginally higher, I\$ 150.

### Moderate pretest probability (50%)

In moderate CAD probability scenario, strategy 2 (Ex-ECG → CTA → CA) remained the least costly strategy, at I\$ 230 per correct diagnosis; however, in this scenario, this strategy resulted in a relatively low overall accuracy of 81%, with over 18% false negative final diagnoses. Strategy 4 (Ex-ECG → CA) improves overall accuracy to 86%, with 14% false negative results, and costs I\$ 240 per correct diagnosis. Resulting in an ICER versus strategy 2 of I\$ 415.

1  
2  
3 In this range of pretest probability, the strategy based on CTA coronary angiography as  
4 initial test (strategy 9) yields significantly better outcomes, with 94% overall accuracy.  
5  
6 Mean cost per diagnosis is I\$ 285, resulting in an ICER versus strategy 4 of I\$ 750 per  
7  
8 correct diagnosis. Strategy 8, based on C-MRI, raises accuracy to 95%, while  
9  
10 increasing mean cost per diagnosis to I\$ 410. ICER for strategy 8 versus strategy 9 is  
11  
12 I\$ 17,800 per correct diagnosis.  
13

14  
15  
16 Remaining strategies have been dominated by strategies 2, 4, 9 and 10. Once again, it  
17  
18 should be noted that strategy 6 (Echo -> CA) yields accuracy results very close to the  
19  
20 ones obtained with strategy 9 (93.6%), at a marginally higher mean cost per diagnosis  
21  
22 of I\$ 305.  
23

#### 24 **High pretest probability (70%)**

25  
26  
27 With a higher prevalence of CAD, strategies that involve two noninvasive tests before  
28  
29 CA are dominated by strategy 4 (Ex-ECG -> CA), which results in 80% correct  
30  
31 identification at I\$ 280 per diagnosis. However, in this range of CAD risk, strategy 4  
32  
33 results in 20% false negative results, seriously hindering its usefulness in practice.  
34

35  
36 If strategies with false negative rates above 20% (1-4) are excluded from analysis,  
37  
38 strategy 9 (CTA -> CA) emerges as an attractive option, with overall accuracy 92%,  
39  
40 and mean cost per diagnosis of I\$ 345. Strategy 6 (Echo -> CA) results in practically  
41  
42 identical effectiveness (91%) at a somewhat higher cost per diagnosis of I\$ 400.  
43

44  
45 A strategy based on invasive CA as first test (strategy 10) results in 98% accuracy,  
46  
47 mean cost per diagnosis I\$ 346, and ICER I\$ 273 versus strategy 9.  
48

#### 49 **Sensitivity Analysis, Scenario Analysis and Radiation exposure**

50  
51  
52 In one-way sensitivity analysis, the choice between CTA and ECHO-based strategies  
53  
54 was sensitive to procedure costs and test sensitivity. For instance, in low-probability  
55  
56 scenarios, CTA dominates ECHO if it costs less than I\$ 129, has higher cost and  
57  
58  
59  
60

1  
2  
3 higher effectiveness with costs between I\$ 129 and 182, and is extensively dominated  
4 by ECHO at higher costs. With high pretest probability, ECHO is the preferred  
5 noninvasive method if it costs up to I\$ 56; and at its maximum price, ECHO is  
6 dominated by CTA.  
7  
8  
9

10  
11 Variation in cost and accuracy of other tests modified cost per diagnosis for each  
12 strategy, but did not alter base-case results to the extent of changing preferred  
13 strategies.  
14  
15  
16

17  
18 In probabilistic sensitivity analysis, there was significant overlap between CTA and  
19 ECHO in terms of cost-effectiveness, demonstrating a high level of uncertainty as to  
20 which of the two strategies would be preferred (**Figure 3**).  
21  
22  
23

24  
25 In the alternative scenario that excludes CA as an initial test, even in the high pretest  
26 probability group, strategy 8, based on C-MRI as first test, becomes the strategy with  
27 highest accuracy, with an ICER versus strategy 9 (CTA -> CA) slightly above \$12,200  
28 with 70% pretest probability.  
29  
30  
31  
32

33  
34 Focusing on currently available imaging modalities, we performed two-way sensitivity  
35 analysis on the choice between ECHO-based and SPECT-based strategies, which  
36 showed ECHO-based strategies to be dominant across the defined spectrum of  
37 sensitivity analysis. SPECT-based strategies are preferred only if the cost of SPECT is  
38 no more than 10% higher than the cost of ECHO.  
39  
40  
41  
42  
43

44  
45 Average radiation dose per patient varied between 3.9 mSv for strategy 1 (Ex-ECG ->  
46 ECHO -> CA) and 16.4 mSv for strategy 5 (SPECT -> CA). For strategy 9, based on  
47 CTA, mean exposure was 15.1 mSv, and for strategy 8, based on C-MRI, it was 5.7  
48 mSv (Supplementary Table A).  
49  
50  
51  
52  
53  
54  
55  
56  
57  
58  
59  
60

## DISCUSSION

Significant interest has been placed on the choice between functional and anatomical strategies for CAD diagnosis. In the management of acute coronary syndrome, CTA outperformed functional testing in three clinical trials [10-12]. However, in stable CAD, randomized data on the clinical impact of selecting a functional or anatomical strategy have only recently been published.

In the PROMISE trial [6], an anatomic strategy based on CTA as initial test resulted in similar clinical outcomes over 2 years, when compared to functional testing. The CTA strategy, probably due to its high sensitivity, resulted in a lower rate of invasive CA with no evidence of CAD in the first 90 days. Coronary revascularization was more frequent with CTA, but long-term clinical significance of this finding is uncertain.

This similar performance of anatomical and functional strategies should prompt physicians and decision-makers to look beyond clinical outcomes in the selection of tests, taking into account information such as cost-effectiveness, resource use, and environmental impact. Recent studies suggest CTA may be a cost-effective option in developed countries [13-15].

In this study, we performed a cost-effectiveness analysis to assess currently available strategies for investigating chest pain in Brazil, and to compare them with new ones, that could become available upon inclusion of CTA and C-MRI among reimbursed tests.

Our study showed that, from the economic perspective, choice of functional test (Ex-ECG, ECHO, SPECT or C-MRI) influences whether a functional or anatomical strategy would be preferable.

The least costly diagnostic strategies are conservative ones, using Ex-ECG as a “gatekeeper”, and proceeding to a second round of noninvasive tests when results are positive. These low-cost strategies have the disadvantage of generating a larger

1  
2  
3 number of false-positive initial tests, thus subjecting patients without CAD to additional  
4 tests. Furthermore, their performance deteriorates as pretest probability rises, so that  
5 at 70% pretest probability their false-negative rate is above 20%. Therefore, such  
6 strategies may be an option for constrained budgets or lack of alternatives, but only  
7 when pretest probability is low or moderate ( $\leq 50\%$ ).  
8  
9

10  
11  
12  
13 As pretest probability increased, costs per correct (positive or negative) diagnosis  
14 becomes higher for strategies based on sequential tests, since positive initial tests are  
15 more frequent, leading to further testing in more patients. This is particularly true for  
16 conservative strategies that require two noninvasive tests before proceeding to  
17 invasive CA. Strategies based on CTA and ECHO as initial test, result in almost  
18 superimposable cost-effectiveness results. These strategies would increase accuracy,  
19 at an ICER versus Ex-ECG-based strategies well below I\$ 11,909 per correct  
20 diagnosis. This makes them attractive options across the entire spectrum of pretest  
21 probabilities.  
22  
23  
24  
25  
26  
27  
28  
29  
30  
31

32 Diagnostic strategies based on C-MRI showed to be highly effective, but their relatively  
33 high (estimated) cost resulted in unfavorable ICERs in moderate- and high-risk  
34 scenarios. If C-MRI costs could be reduced to figures lower than I\$ 200 estimated, it  
35 could become cost-effective enough to recommend for widespread implementation in  
36 SUS. Nonetheless, it is important to emphasize that, for this cost, availability and  
37 acquisition values were not taken into account.  
38  
39  
40  
41  
42  
43  
44

45 Noninvasive strategies based on SPECT generated consistently unfavorable results,  
46 due to the high cost of SPECT when compared to other noninvasive tests, and have  
47 been dominated in all scenarios. In addition, radiation-related risks were not included in  
48 our short-term model because potential effects of radiation exposure take more than a  
49 decade to manifest. Still, this could be an additional cause for concern regarding  
50 widespread use of tests such as SPECT and CTA.  
51  
52  
53  
54  
55  
56  
57  
58  
59  
60

1  
2  
3 Our study's main limitation is that, since public health system does not reimburse CTA  
4 and C-MRI, we had to estimate procedure costs from private practice. In case of  
5 incorporation of these tests into the public system, actual reimbursement values may  
6 vary, although we did not expect significant discrepancy based on previous cases. Still,  
7 our results were robust even when we halved or doubled the value of our initial cost  
8 estimate.  
9  
10  
11  
12  
13

14  
15  
16 Current practice in Brazil usually prioritizes SPECT-based over ECHO-based strategies  
17 for diagnosing CAD. Based on the national database, in the year 2013, the Brazilian  
18 public health system reimbursed over 100,000 SPECT tests and less than 19,000  
19 ECHO tests for outpatients [3]. Our results suggest that ECHO-based strategies should  
20 be more widely employed in SUS, especially considering their absence of radiation and  
21 low costs for implementation and maintenance.  
22  
23  
24  
25  
26  
27

28  
29 Updating reimbursement values for ECHO may stimulate the availability of this test in  
30 the public health system, and seems justified, since our sensitivity analysis showed that  
31 ECHO would remain more cost-effective than SPECT even with costs up to 4 times  
32 higher than current rates.  
33  
34  
35  
36  
37  
38  
39  
40  
41  
42  
43  
44  
45  
46  
47  
48  
49  
50  
51  
52  
53  
54  
55  
56  
57  
58  
59  
60



## CONCLUSIONS

For the diagnosis of stable CAD, strategies based on exercise ECG are the least expensive, but their lower effectiveness means they are best suited for constrained budgets, and only when pretest probability is low or moderate.

Regarding technologies that are currently available in SUS, stress echocardiography is more cost-effective than SPECT, and should generally be preferred if available.

Incorporation of coronary computed tomography into SUS would add a cost-effective option for CAD diagnosis. Stress cardiac magnetic resonance yielded acceptable ICER only at low pretest probability. Our results suggest that the immediate incorporation of coronary computed tomography into SUS is advisable if actual test costs can match our estimated cost of I\$ 100 per test. Incorporation of stress cardiac MRI should be considered only if its costs can be reduced to values significantly lower than our estimate of I\$ 200.

**CONTRIBUTORSHIP STATEMENT**

EGB and CAP designed the study, with input from LEPR and SFS. EGB and SFS collected the data. EGB analyzed the data with input from all authors. All authors contributed to the interpretation of the results and write up for publication.

**COMPETING INTERESTS**

None.

**FUNDING**

This study was supported by the CNPq (MCT/MS), under the Program of the National Institute for Science and Technology (INCT) for Health Technology Assessment (IATS).

Prof Rohde and Prof. Polanczyk received research scholarship from CNPq.

**DATA SHARING STATEMENT**

No additional data are available.

**REFERENCES**

1. Global Burden of Disease Study 2013 Collaborators. Global, regional, and national incidence, prevalence, and years lived with disability for 301 acute and chronic diseases and injuries in 188 countries, 1990-2013: a systematic analysis for the Global Burden of Disease Study 2013. *Lancet* 2015;386(9995):743-800.
2. Fihn SD, Gardin JM, Abrams J, Berra K, Blankenship JC, Dallas AP, Douglas PS, Foody JM, Gerber TC, Hinderliter AL, King SB, 3rd, Kligfield PD, Krumholz HM, Kwong RY, Lim MJ, Linderbaum JA, Mack MJ, Munger MA, Prager RL, Sabik JF, Shaw LJ, Sikkema JD, Smith CR, Jr., Smith SC, Jr., Spertus JA, Williams SV, Anderson JL, American College of Cardiology Foundation/American Heart Association Task F. 2012 ACCF/AHA/ACP/AATS/PCNA/SCAI/STS guideline for the diagnosis and management of patients with stable ischemic heart disease: a report of the American College of Cardiology Foundation/American Heart Association task force on practice guidelines, and the American College of Physicians, American Association for Thoracic Surgery, Preventive Cardiovascular Nurses Association, Society for Cardiovascular Angiography and Interventions, and Society of Thoracic Surgeons. *Circulation* 2012;126:e354-471.
3. Ministério da Saúde do Brasil. DATASUS. 2013; Available from: <http://www.datasus.gov.br>.
4. Cooper A, Timmis A, Skinner J. Assessment of recent onset chest pain or discomfort of suspected cardiac origin: summary of NICE guidance. *BMJ* 2010;340:c1118.
5. Task Force Members, Montalescot G, Sechtem U, Achenbach S, Andreotti F, Arden C, Budaj A, Bugiardini R, Crea F, Cuisset T, Di Mario C, Ferreira JR, Gersh BJ, Gitt AK, Hulot JS, Marx N, Opie LH, Pfisterer M, Prescott E, Ruschitzka F, Sabate M, Senior R, Taggart DP, van der Wall EE, Vrints CJ, Guidelines

1  
2  
3 ESCCfP, Zamorano JL, Achenbach S, Baumgartner H, Bax JJ, Bueno H, Dean  
4 V, Deaton C, Erol C, Fagard R, Ferrari R, Hasdai D, Hoes AW, Kirchhof P,  
5 Knuuti J, Kolh P, Lancellotti P, Linhart A, Nihoyannopoulos P, Piepoli MF,  
6 Ponikowski P, Sirnes PA, Tamargo JL, Tendera M, Torbicki A, Wijns W,  
7 Windecker S, Document R, Knuuti J, Valgimigli M, Bueno H, Claeys MJ,  
8 Donner-Banzhoff N, Erol C, Frank H, Funck-Brentano C, Gaemperli O,  
9 Gonzalez-Juanatey JR, Hamilos M, Hasdai D, Husted S, James SK, Kervinen  
10 K, Kolh P, Kristensen SD, Lancellotti P, Maggioni AP, Piepoli MF, Pries AR,  
11 Romeo F, Ryden L, Simoons ML, Sirnes PA, Steg PG, Timmis A, Wijns W,  
12 Windecker S, Yildirim A, Zamorano JL. 2013 ESC guidelines on the  
13 management of stable coronary artery disease: the Task Force on the  
14 management of stable coronary artery disease of the European Society of  
15 Cardiology. *Eur Heart J* 2013;34:2949-3003.

16  
17  
18  
19  
20  
21  
22  
23  
24  
25  
26  
27  
28  
29 6. Douglas PS, Hoffmann U, Patel MR, Mark DB, Al-Khalidi HR, Cavanaugh B, Cole J,  
30 Dolor RJ, Fordyce CB, Huang M, Khan MA, Kosinski AS, Krucoff MW, Malhotra  
31 V, Picard MH, Udelson JE, Velazquez EJ, Yow E, Cooper LS, Lee KL.  
32 Outcomes of Anatomical versus Functional Testing for Coronary Artery  
33 Disease. *N Engl J Med* 2015;372:1291-1300.

34  
35  
36  
37  
38  
39 7. Associação Médica Brasileira. Classificação Brasileira Hierarquizada de  
40 Procedimentos Médicos (CBHPM). São Paulo: Associação Médica Brasileira;  
41 2013. 206 p.

42  
43  
44  
45 8. World Bank. World Development Indicators & Global Development Finance. 2012;  
46 Available from: <http://databank.worldbank.org>.

47  
48  
49 9. WHO Commission on Macroeconomics and Health. Macroeconomics and health:  
50 investing in health for economic development. Report of the Commission on  
51 Macroeconomics and Health. Geneva: World Health Organization; 2001. 200  
52 p.

- 1  
2  
3 10. Cury RC, Budoff M, Taylor AJ. Coronary CT angiography versus standard of care  
4 for assessment of chest pain in the emergency department. *J Cardiovasc*  
5 *Comput Tomogr* 2013; 7:79-82.  
6  
7  
8  
9 11. Hoffmann U, Truong QA, Schoenfeld DA, Chou ET, Woodard PK, Nagurney JT,  
10 Pope JH, Hauser TH, White CS, Weiner SG, Kalanjian S, Mullins ME, Mikati I,  
11 Peacock WF, Zakrotsky P, Hayden D, Goehler A, Lee H, Gazelle GS, Wiviott  
12 SD, Fleg JL, Udelson JE. Coronary CT angiography versus standard evaluation  
13 in acute chest pain. *N Engl J Med* 2012;367:299-308.  
14  
15  
16  
17  
18 12. Goldstein JA, Chinnaiyan KM, Abidov A, Achenbach S, Berman DS, Hayes SW,  
19 Hoffmann U, Lesser JR, Mikati IA, O'Neil BJ, Shaw LJ, Shen MY, Valeti US,  
20 Raff GL, Investigators C-S. The CT-STAT (Coronary Computed Tomographic  
21 Angiography for Systematic Triage of Acute Chest Pain Patients to Treatment)  
22 trial. *J Am Coll Cardiol* 2011; 58:1414-22.  
23  
24  
25  
26  
27  
28 13. Genders TS, Petersen SE, Pugliese F, Dastidar AG, Fleischmann KE, Nieman K,  
29 et al. The Optimal Imaging Strategy for Patients With Stable Chest Pain: A  
30 Cost-Effectiveness Analysis. *Ann Intern Med.* 2015;162:474-484.  
31  
32  
33  
34  
35  
36  
37  
38 14. Nielsen LH, Olsen J, Markenvar J, Jensen JM, Nørgaard BL. Effects on costs of  
39 frontline diagnostic evaluation in patients suspected of angina: coronary  
40 computed tomography angiography vs. conventional ischaemia testing. *Eur*  
41 *Heart J Cardiovasc Imaging* 2013, 14 (5) 449-455; DOI: 10.1093/ehjci/jes166.  
42  
43  
44  
45 15. Zeb I, Abbas N, Nasir K, Budoff MJ. Coronary computed tomography as a  
46 cost-effective test strategy for coronary artery disease assessment – A  
47 systematic review. *Atherosclerosis* 2014;234:426-35. doi:  
48  
49  
50  
51  
52  
53 16. Mowatt G, Vale L, Brazzelli M, Hernandez R, Murray A, Scott N, Fraser C,  
54 McKenzie L, Gemmell H, Hillis G, Metcalfe M. Systematic review of the  
55 effectiveness and cost-effectiveness, and economic evaluation, of myocardial  
56  
57  
58  
59  
60

- 1  
2  
3 perfusion scintigraphy for the diagnosis and management of angina and  
4 myocardial infarction. *Health technology assessment* 2004;8:iii-iv, 1-207.
- 5  
6  
7 17. Patterson RE, Eisner RL, Horowitz SF. Comparison of cost-effectiveness and utility  
8 of exercise ECG, single photon emission computed tomography, positron  
9 emission tomography, and coronary angiography for diagnosis of coronary  
10 artery disease. *Circulation* 1995;91:54-65.
- 11  
12  
13 18. Fleischmann KE, Hunink MG, Kuntz KM, Douglas PS. Exercise echocardiography  
14 or exercise SPECT imaging? A meta-analysis of diagnostic test performance.  
15 *JAMA* 1998;280:913-20.
- 16  
17  
18 19. Toronto Health Economics and Technology Assessment (THETA). Relative Cost-  
19 effectiveness of Five Non-invasive Cardiac Imaging Technologies for  
20 Diagnosing Coronary Artery Disease in Ontario. 2010. Available in  
21 [http://www.theta.utoronto.ca/papers/theta\_report\_007.pdf].
- 22  
23  
24 20. Arbab-Zadeh A, Miller JM, Rochitte CE, Dewey M, Niinuma H, Gottlieb I, Paul N,  
25 Clouse ME, Shapiro EP, Hoe J, Lardo AC, Bush DE, de Roos A, Cox C, Brinker  
26 J, Lima JA. Diagnostic accuracy of computed tomography coronary  
27 angiography according to pre-test probability of coronary artery disease and  
28 severity of coronary arterial calcification. The CORE-64 (Coronary Artery  
29 Evaluation Using 64-Row Multidetector Computed Tomography Angiography)  
30 International Multicenter Study. *J Am Coll Cardiol* 2012; 59:379-87.
- 31  
32  
33 21. Mowatt G, Cummins E, Waugh N, Walker S, Cook J, Jia X, Hillis GS, Fraser C.  
34 Systematic review of the clinical effectiveness and cost-effectiveness of 64-slice  
35 or higher computed tomography angiography as an alternative to invasive  
36 coronary angiography in the investigation of coronary artery disease. *Health  
37 technology assessment* 2008;12:iii-iv, ix-143.
- 38  
39  
40 22. Cooper A, Calvert N, Skinner J, Sawyer L, Sparrow K, Timmis A, Turnbull N,  
41 Cotterell M, Hill D, Adams P, Ashcroft J, Clark L, Coulden R, Hemingway H,  
42 James C, Jarman H, Kendall J, Lewis P, Patel K, Smeeth L, Taylor J. *Chest*
- 43  
44  
45  
46  
47  
48  
49  
50  
51  
52  
53  
54  
55  
56  
57  
58  
59  
60

1  
2  
3 Pain of Recent Onset: Assessment and Diagnosis of Recent Onset Chest Pain  
4 or Discomfort of Suspected Cardiac Origin. London: National Institute for Health  
5 and Clinical Excellence (NICE); 2010. 393 p.  
6  
7

8  
9 23. Hamon M, Fau G, Nee G, Ehtisham J, Morello R. Meta-analysis of the diagnostic  
10 performance of stress perfusion cardiovascular magnetic resonance for  
11 detection of coronary artery disease. J Cardiovasc Magn Reson 2010; 12:29.  
12  
13

14  
15 24. Patel MR, Peterson ED, Dai D, Brennan JM, Redberg RF, Anderson HV, Brindis  
16 RG, Douglas PS. Low diagnostic yield of elective coronary angiography. N Engl  
17 J Med 2010;362:886-95.  
18  
19  
20  
21  
22  
23  
24  
25  
26  
27  
28  
29  
30  
31  
32  
33  
34  
35  
36  
37  
38  
39  
40  
41  
42  
43  
44  
45  
46  
47  
48  
49  
50  
51  
52  
53  
54  
55  
56  
57  
58  
59  
60

## Figures and legends

**Figure 1.** Schematic representation of model structure.

**Figure 2.** Base-case cost-effectiveness results for predefined risk categories.

Strategies 1-4 excluded from high-probability analysis (see text for details).

Ex-ECG = exercise electrocardiogram; ECHO = stress echocardiogram; SPECT = single-photon emission computed tomography; CTA = computed tomography coronary angiogram; MRI = cardiac magnetic resonance; CA = invasive coronary angiography

**Figure 3.** Scatterplot of incremental cost-effectiveness of strategy 9 (CTA-CA) versus strategy 6 (ECHO-CA).

ECHO = stress echocardiogram; CTA = computed tomography coronary angiogram; CA = invasive coronary angiography. Dotted line represents willingness-to-pay threshold; ellipse contains 95% of outputs.



**Tables**

**Table 1.** Test sequence in each modeled strategy.

\* Strategies 10 and 11, in which invasive coronary angiography is the first test, are only considered in scenarios with high pretest probability.

SPECT = single-photon emission computed tomography; MRI = cardiac magnetic resonance.

**Table 2.** Characteristics of tests; range of values used in sensitivity analysis; and costs.

Ex-ECG = exercise electrocardiogram; ECHO = stress echocardiogram; SPECT = single-photon emission computed tomography; CTA = computed tomography coronary angiogram; MRI = cardiac magnetic resonance; CA = invasive coronary angiography

**Table 3.** Base-case results for different pretest probabilities. Dominated strategies not shown, except when significant uncertainty regarding dominance on sensitivity analysis.\*ICER vs. strategy 1; †ICER vs. strategy 9; ‡ICER vs. strategy 2; §ICER vs. strategy 4. Avg = average.

C-E = cost-effectiveness; ICER = incremental cost-effectiveness ratio; FN = false-negative; Ex-ECG = exercise electrocardiogram; ECHO = stress echocardiogram; CTA = computed tomography coronary angiogram; MRI = cardiac magnetic resonance; CA = invasive coronary angiography

**Table 1. Test sequence in each modeled strategy.**

|                   | <b>1st test</b>         | <b>2nd test</b>            | <b>3rd test</b>      |
|-------------------|-------------------------|----------------------------|----------------------|
| <b>Strat. 1</b>   | exercise ECG            | stress<br>echocardiography | coronary angiography |
| <b>Strat. 2</b>   | exercise ECG            | coronary CT<br>angiography | coronary angiography |
| <b>Strat. 3</b>   | exercise ECG            | SPECT                      | coronary angiography |
| <b>Strat. 4</b>   | exercise ECG            | coronary angiography       |                      |
| <b>Strat. 5</b>   | SPECT                   | coronary angiography       |                      |
| <b>Strat. 6</b>   | stress echocardiography | coronary angiography       |                      |
| <b>Strat. 7</b>   | stress echocardiography | coronary CT<br>angiography | coronary angiography |
| <b>Strat. 8</b>   | stress cardiac MRI      | coronary angiography       |                      |
| <b>Strat. 9</b>   | coronary CT angiography | coronary angiography       |                      |
| <b>Strat. 10*</b> | coronary angiography    | stress echocardiography    |                      |
| <b>Strat. 11*</b> | coronary angiography    | SPECT                      |                      |

**Table 2. Characteristics of tests; range of values used in sensitivity analysis; and costs.**

| <b>Test</b>   | <b>Sensitivity<br/>(%) [range]</b> | <b>Specificity<br/>(%) [range]</b> | <b>Indeterm.<br/>(%)</b> | <b>Mortality<br/>(‰)</b> | <b>Cost<br/>(I\$)</b> | <b>Sources</b>       |
|---------------|------------------------------------|------------------------------------|--------------------------|--------------------------|-----------------------|----------------------|
| <b>Ex-ECG</b> | 65 [42 – 92]                       | 67 [43 – 83]                       | 18                       | 0.05                     | 16                    | [3 16 17]            |
| <b>ECHO</b>   | 85 [83 – 87]                       | 77 [74 – 80]                       | 15                       | 0.05                     | 87                    | [3 18 19]            |
| <b>SPECT</b>  | 87 [84 – 88]                       | 64 [60 – 76]                       | 6.9                      | 0.05                     | 419                   | [3 18 19]            |
| <b>CTA</b>    | 88 [83 – 92]                       | 87 [80 – 92]                       | 2                        | 0.01                     | 101                   | [3 20-22]            |
| <b>MRI</b>    | 89 [88 – 94]                       | 80 [75 – 87]                       | 5                        | 0.01                     | 200                   | [3 19 23]            |
| <b>CA</b>     | 100                                | 100                                | 10                       | 0.2                      | 325                   | Assumption, [3 4 24] |

Table 3. Base-case results for different pretest probabilities.

| Pretest Probability | Strategy                 | Avg cost per patient (£) | C-E (£/diag) | ICER (£/diag) | Accuracy (%) | FN (%) | Deaths (%) | Invasive CA (%) | Negative invasive CA (%) |
|---------------------|--------------------------|--------------------------|--------------|---------------|--------------|--------|------------|-----------------|--------------------------|
| LOW                 | 2 (Ex-ECG -> CTA -> CA)  | 125                      | 135          | -             | 93           | 7.4    | 0.009      | 18              | 5                        |
|                     | 1 (Ex-ECG -> ECHO -> CA) | 141                      | 153          | -             | 92           | 7.6    | 0.012      | 25              | 12                       |
|                     | 9 (CTA -> CA)            | 197                      | 202          | 1,420*        | 98           | 2.4    | 0.007      | 29              | 12                       |
|                     | 8 (C-MRI -> CA)          | 315                      | 322          | 47,800†       | 98           | 2.1    | 0.008      | 37              | 19                       |
| MODERATE            | 2 (Ex-ECG -> CTA -> CA)  | 188                      | 231          | -             | 81           | 18.5   | 0.013      | 35              | 3                        |
|                     | 4 (Ex-ECG -> CA)         | 205                      | 240          | 415‡          | 86           | 14.3   | 0.017      | 58              | 23                       |
|                     | 9 (CTA -> CA)            | 269                      | 286          | 750§          | 94           | 5.9    | 0.011      | 51              | 7                        |
|                     | 6 (ECHO -> CA)           | 286                      | 305          | -             | 94           | 6.4    | 0.017      | 61              | 17                       |
|                     | 8 (C-MRI -> CA)          | 385                      | 407          | 17,800†       | 95           | 5.2    | 0.012      | 57              | 12                       |
| HIGH                | 4 (Ex-ECG -> CA)         | 222                      | 278          | -             | 80           | 20.1   | 0.018      | 63              | 14                       |
|                     | 9 (CTA -> CA)            | 317                      | 345          | 790§          | 92           | 8.2    | 0.014      | 66              | 4                        |
|                     | 6 (ECHO -> CA)           | 320                      | 351          | -             | 91           | 8.9    | 0.019      | 71              | 10                       |
|                     | 10 (CA -> ECHO)          | 373                      | 381          | 273†          | 98           | 1.7    | 0.02       | 100             | 30                       |

1  
2  
3  
4  
5  
6  
7  
8  
9  
10  
11  
12  
13  
14  
15  
16  
17  
18  
19  
20  
21  
22  
23  
24  
25  
26  
27  
28  
29  
30  
31  
32  
33  
34  
35  
36  
37  
38  
39  
40  
41  
42  
43  
44  
45  
46  
47  
48  
49  
50  
51  
52  
53  
54  
55  
56  
57  
58  
59  
60



Figure 1. Schematic representation of model structure.

199x127mm (300 x 300 DPI)

Review only

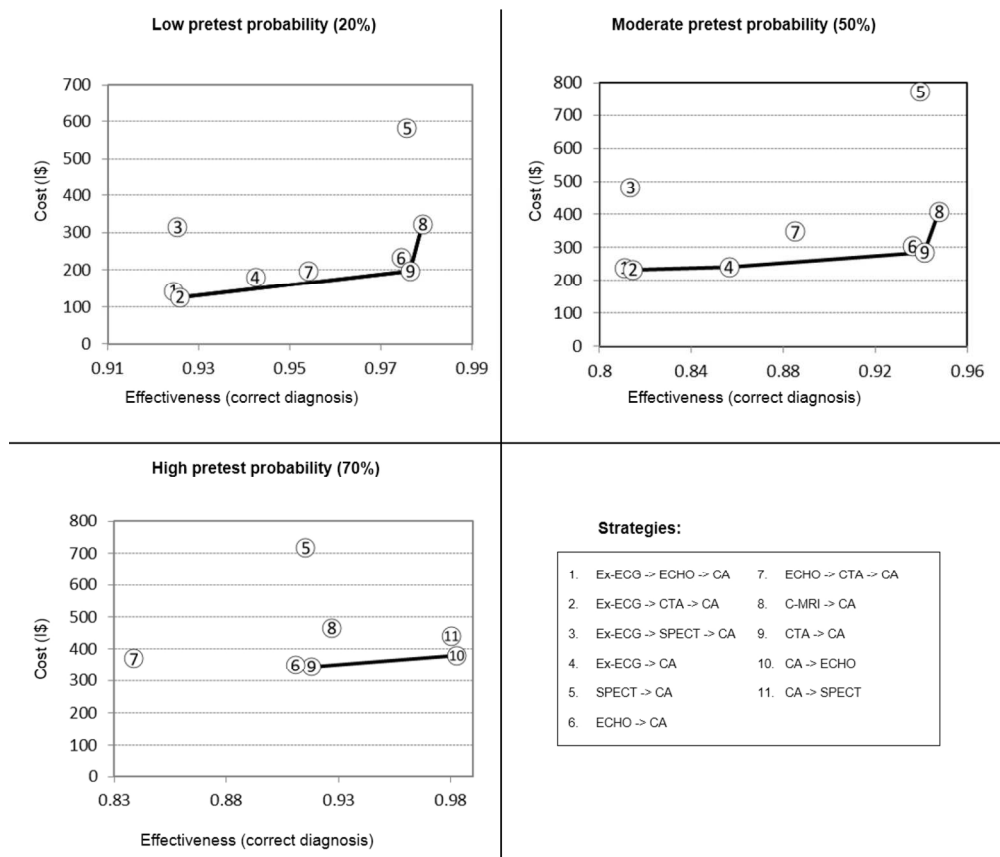

Figure 2. Base-case cost-effectiveness results for predefined risk categories. Strategies 1-4 excluded from high-probability analysis (see text for details).  
 Ex-ECG = exercise electrocardiogram; ECHO = stress echocardiogram; SPECT = single-photon emission computed tomography; CTA = computed tomography coronary angiogram; MRI = cardiac magnetic resonance; CA = invasive coronary angiography

199x172mm (300 x 300 DPI)

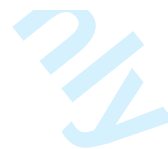

1  
2  
3  
4  
5  
6  
7  
8  
9  
10  
11  
12  
13  
14  
15  
16  
17  
18  
19  
20  
21  
22  
23  
24  
25  
26  
27  
28  
29  
30  
31  
32  
33  
34  
35  
36  
37  
38  
39  
40  
41  
42  
43  
44  
45  
46  
47  
48  
49  
50  
51  
52  
53  
54  
55  
56  
57  
58  
59  
60

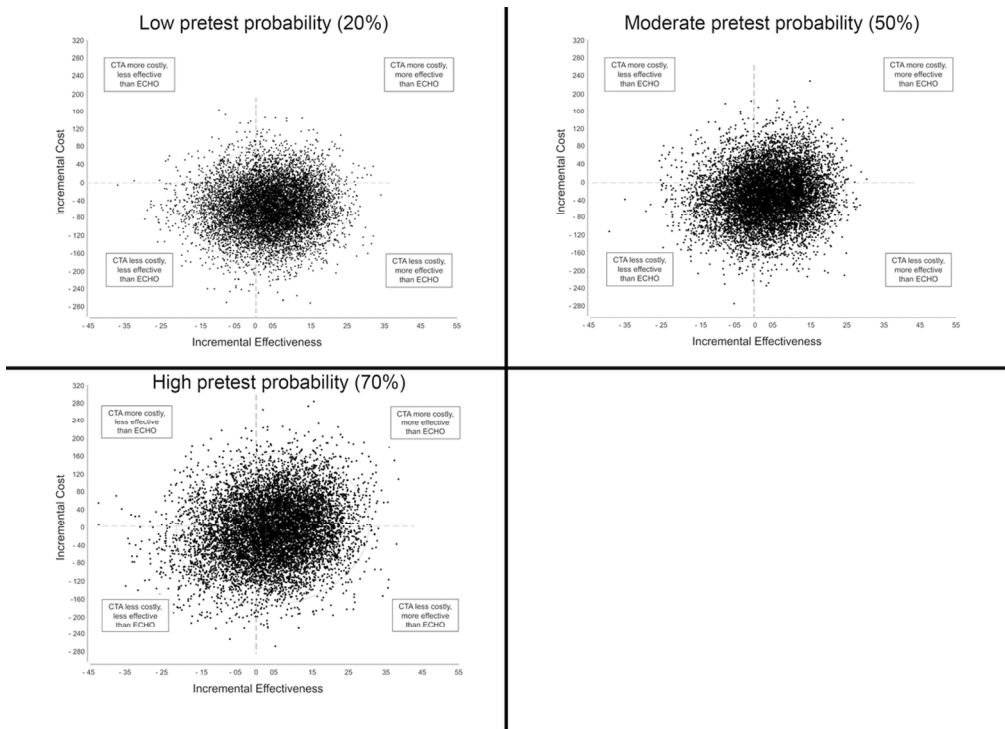

Figure 3. Scatterplot of incremental cost-effectiveness of strategy 9 (CTA-CA) versus strategy 6 (ECHO-CA).  
 ECHO = stress echocardiogram; CTA = computed tomography coronary angiogram; CA = invasive coronary angiography. Dotted line represents willingness-to-pay threshold; ellipse contains 95% of outputs.  
 Figure 3  
 52x38mm (600 x 600 DPI)

**Supplementary Table A:** Mean cumulative radiation dose per patient in each modelled strategy.

| Strategy | Tests                 | Avg. dose (mSv) |
|----------|-----------------------|-----------------|
| 1        | Ex-ECG -> ECHO -> CA  | 3.9             |
| 2        | Ex-ECG -> CTA -> CA   | 9.3             |
| 3        | Ex-ECG -> SPECT -> CA | 9.8             |
| 4        | Ex-ECG -> CA          | 5.8             |
| 5        | SPECT -> CA           | 16.4            |
| 6        | ECHO -> CA            | 6.1             |
| 7        | ECHO -> CTA -> CA     | 10.2            |
| 8        | C-MRI -> CA           | 5.7             |
| 9        | CTA -> CA             | 15.1            |
| 10       | CA -> ECHO            | 10              |
| 11       | CA -> SPECT           | 11              |

Ex-ECG = exercise electrocardiogram; ECHO = stress echocardiogram; SPECT = single-photon emission computed tomography; CTA = computed tomography coronary angiogram; C-MRI = cardiac magnetic resonance; CA = invasive coronary angiography



Supplementary Figure A: Detailed depiction of model structure

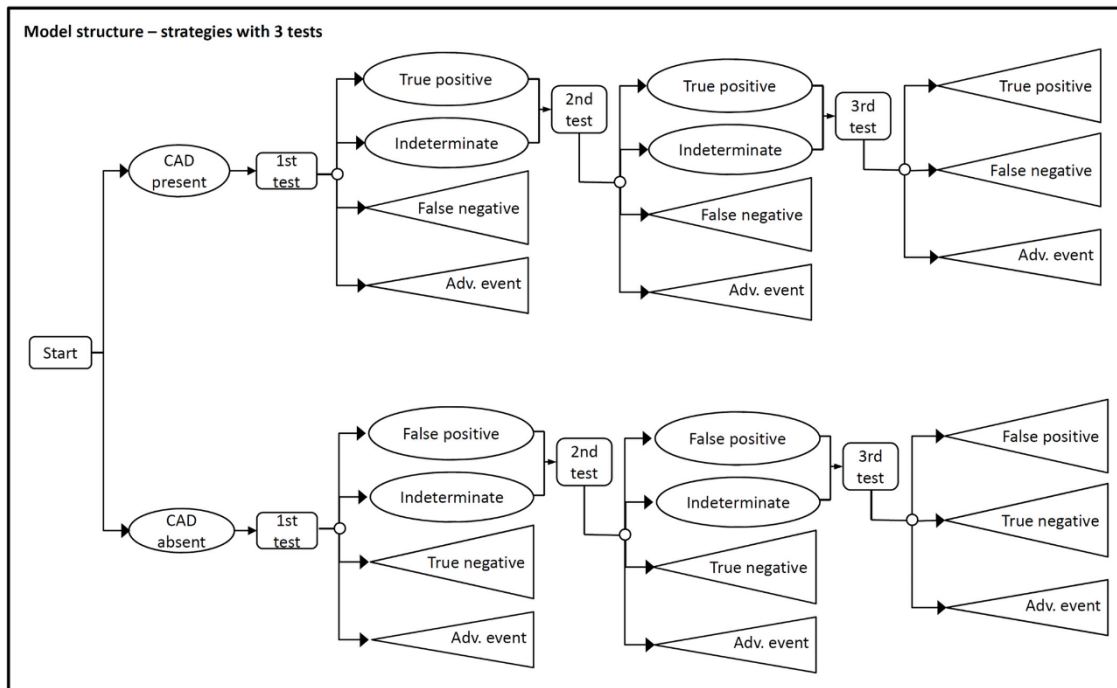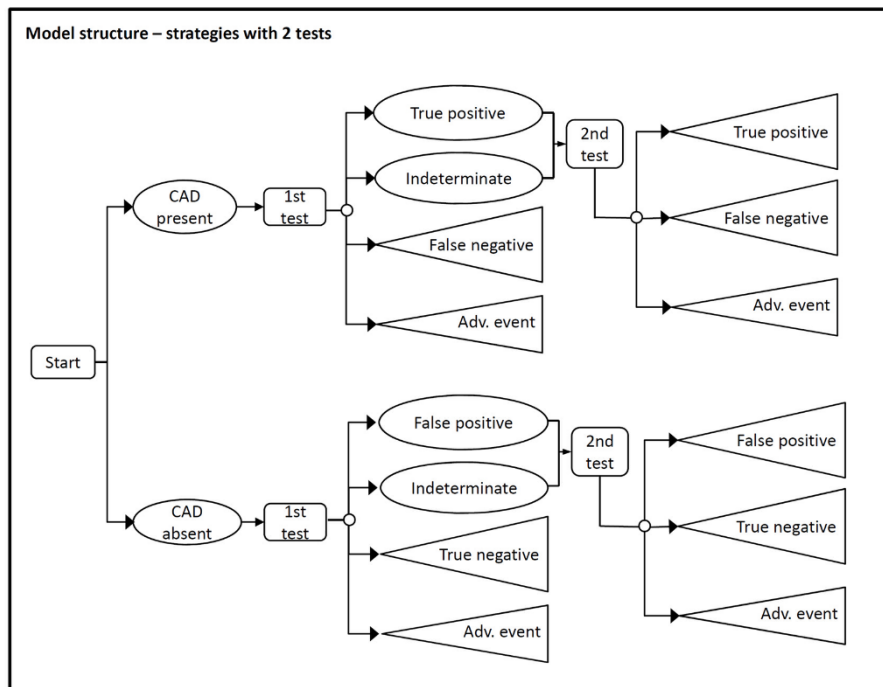

CAD = Coronary artery disease.

**CHEERS Checklist****Items to include when reporting economic evaluations of health interventions**

The **ISPOR CHEERS Task Force Report**, *Consolidated Health Economic Evaluation Reporting Standards (CHEERS)—Explanation and Elaboration: A Report of the ISPOR Health Economic Evaluations Publication Guidelines Good Reporting Practices Task Force*, provides examples and further discussion of the 24-item CHEERS Checklist and the CHEERS Statement. It may be accessed via the *Value in Health* or via the ISPOR Health Economic Evaluation Publication Guidelines – CHEERS: Good Reporting Practices webpage: <http://www.ispor.org/TaskForces/EconomicPubGuidelines.asp>

| Section/item                    | Item No | Recommendation                                                                                                                                                                             | Reported on page No/line No |
|---------------------------------|---------|--------------------------------------------------------------------------------------------------------------------------------------------------------------------------------------------|-----------------------------|
| <b>Title and abstract</b>       |         |                                                                                                                                                                                            |                             |
| Title                           | 1       | Identify the study as an economic evaluation or use more specific terms such as “cost-effectiveness analysis”, and describe the interventions compared.                                    | 1 / 1                       |
| Abstract                        | 2       | Provide a structured summary of objectives, perspective, setting, methods (including study design and inputs), results (including base case and uncertainty analyses), and conclusions.    | 2 / 1                       |
| <b>Introduction</b>             |         |                                                                                                                                                                                            |                             |
| Background and objectives       | 3       | Provide an explicit statement of the broader context for the study.<br>Present the study question and its relevance for health policy or practice decisions.                               | 4                           |
| <b>Methods</b>                  |         |                                                                                                                                                                                            |                             |
| Target population and subgroups | 4       | Describe characteristics of the base case population and subgroups analysed, including why they were chosen.                                                                               | 6                           |
| Setting and location            | 5       | State relevant aspects of the system(s) in which the decision(s) need(s) to be made.                                                                                                       | 8                           |
| Study perspective               | 6       | Describe the perspective of the study and relate this to the costs being evaluated.                                                                                                        | 6                           |
| Comparators                     | 7       | Describe the interventions or strategies being compared and state why they were chosen.                                                                                                    | 6                           |
| Time horizon                    | 8       | State the time horizon(s) over which costs and consequences are being evaluated and say why appropriate.                                                                                   | 6                           |
| Discount rate                   | 9       | Report the choice of discount rate(s) used for costs and outcomes and say why appropriate.                                                                                                 | N/A                         |
| Choice of health outcomes       | 10      | Describe what outcomes were used as the measure(s) of benefit in the evaluation and their relevance for the type of analysis performed.                                                    | 8                           |
| Measurement of effectiveness    | 11a     | <i>Single study-based estimates:</i> Describe fully the design features of the single effectiveness study and why the single study was a sufficient source of clinical effectiveness data. | N/A                         |



1  
2  
3  
4  
5  
6  
7  
8  
9  
10  
11  
12  
13  
14  
15  
16  
17  
18  
19  
20  
21  
22  
23  
24  
25  
26  
27  
28  
29  
30  
31  
32  
33  
34  
35  
36  
37  
38  
39  
40  
41  
42  
43  
44  
45  
46  
47  
48  
49  
50  
51  
52  
53  
54  
55  
56  
57  
58  
59  
60

|                                                        |     |                                                                                                                                                                                                                                                                                                                                                       |             |
|--------------------------------------------------------|-----|-------------------------------------------------------------------------------------------------------------------------------------------------------------------------------------------------------------------------------------------------------------------------------------------------------------------------------------------------------|-------------|
|                                                        | 11b | <i>Synthesis-based estimates</i> : Describe fully the methods used for identification of included studies and synthesis of clinical effectiveness data.                                                                                                                                                                                               | 8           |
| Measurement and valuation of preference based outcomes | 12  | If applicable, describe the population and methods used to elicit preferences for outcomes.                                                                                                                                                                                                                                                           | N/A         |
| Estimating resources and costs                         | 13a | <i>Single study-based economic evaluation</i> : Describe approaches used to estimate resource use associated with the alternative interventions. Describe primary or secondary research methods for valuing each resource item in terms of its unit cost. Describe any adjustments made to approximate to opportunity costs.                          | N/A         |
|                                                        | 13b | <i>Model-based economic evaluation</i> : Describe approaches and data sources used to estimate resource use associated with model health states. Describe primary or secondary research methods for valuing each resource item in terms of its unit cost. Describe any adjustments made to approximate to opportunity costs.                          | 8           |
| Currency, price date, and conversion                   | 14  | Report the dates of the estimated resource quantities and unit costs. Describe methods for adjusting estimated unit costs to the year of reported costs if necessary. Describe methods for converting costs into a common currency base and the exchange rate.                                                                                        | 8           |
| Choice of model                                        | 15  | Describe and give reasons for the specific type of decision-analytical model used. Providing a figure to show model structure is strongly recommended.                                                                                                                                                                                                | p.5 / fig.1 |
| Assumptions                                            | 16  | Describe all structural or other assumptions underpinning the decision-analytical model.                                                                                                                                                                                                                                                              | 10          |
| Analytical methods                                     | 17  | Describe all analytical methods supporting the evaluation. This could include methods for dealing with skewed, missing, or censored data; extrapolation methods; methods for pooling data; approaches to validate or make adjustments (such as half cycle corrections) to a model; and methods for handling population heterogeneity and uncertainty. | 10          |
| <b>Results</b>                                         |     |                                                                                                                                                                                                                                                                                                                                                       |             |
| Study parameters                                       | 18  | Report the values, ranges, references, and, if used, probability distributions for all parameters. Report reasons or sources for distributions used to represent uncertainty where appropriate. Providing a table to show the input values is strongly recommended.                                                                                   | Table 2     |
| Incremental costs and outcomes                         | 19  | For each intervention, report mean values for the main categories of estimated costs and outcomes of interest, as well as mean differences between the comparator groups. If applicable, report incremental cost-effectiveness ratios.                                                                                                                | Table 3     |
| Characterising uncertainty                             | 20a | <i>Single study-based economic evaluation</i> : Describe the effects of sampling uncertainty for the estimated incremental cost and incremental effectiveness parameters, together with the impact                                                                                                                                                    | N/A         |

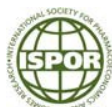

|                                                                      |     |                                                                                                                                                                                                                                                                            |                  |
|----------------------------------------------------------------------|-----|----------------------------------------------------------------------------------------------------------------------------------------------------------------------------------------------------------------------------------------------------------------------------|------------------|
|                                                                      |     | of methodological assumptions (such as discount rate, study perspective).                                                                                                                                                                                                  |                  |
|                                                                      | 20b | <i>Model-based economic evaluation:</i> Describe the effects on the results of uncertainty for all input parameters, and uncertainty related to the structure of the model and assumptions.                                                                                | <u>pp. 15-16</u> |
| Characterising heterogeneity                                         | 21  | If applicable, report differences in costs, outcomes, or cost-effectiveness that can be explained by variations between subgroups of patients with different baseline characteristics or other observed variability in effects that are not reducible by more information. | <u>pp. 15-16</u> |
| <b>Discussion</b>                                                    |     |                                                                                                                                                                                                                                                                            |                  |
| Study findings, limitations, generalisability, and current knowledge | 22  | Summarise key study findings and describe how they support the conclusions reached. Discuss limitations and the generalisability of the findings and how the findings fit with current knowledge.                                                                          | <u>pp. 17-19</u> |
| <b>Other</b>                                                         |     |                                                                                                                                                                                                                                                                            |                  |
| Source of funding                                                    | 23  | Describe how the study was funded and the role of the funder in the identification, design, conduct, and reporting of the analysis. Describe other non-monetary sources of support.                                                                                        | <u>20</u>        |
| Conflicts of interest                                                | 24  | Describe any potential for conflict of interest of study contributors in accordance with journal policy. In the absence of a journal policy, we recommend authors comply with International Committee of Medical Journal Editors recommendations.                          | <u>20</u>        |

For consistency, the CHEERS Statement checklist format is based on the format of the CONSORT statement checklist

The **ISPOR CHEERS Task Force Report** provides examples and further discussion of the 24-item CHEERS Checklist and the CHEERS Statement. It may be accessed via the *Value in Health* link or via the ISPOR Health Economic Evaluation Publication Guidelines – CHEERS: Good Reporting Practices webpage: <http://www.ispor.org/TaskForces/EconomicPubGuidelines.asp>

The citation for the CHEERS Task Force Report is:  
 Husereau D, Drummond M, Petrou S, et al. Consolidated health economic evaluation reporting standards (CHEERS)—Explanation and elaboration: A report of the ISPOR health economic evaluations publication guidelines good reporting practices task force. *Value Health* 2013;16:231-50.



Supplement: bmjopen-2016-012652.draft_revisions.pdf [file bmjopen-2016-012652.draft_revisions.pdf]
