# Supplementary material for: Cost-effectiveness of anatomical and functional test strategies for stable chest pain: public health perspective from a middle-income country
Source: PubMed Central journal article supplement — BMJ Open. 2017 May 4;7(4):e012652. doi: 10.1136/bmjopen-2016-012652 (PMC5623398; doi:10.1136/bmjopen-2016-012652), 2017-05-04
Supplement: bmjopen-2016-012652supp001.pdf [file bmjopen-2016-012652supp001.pdf]

**Supplementary Table A:** Mean cumulative radiation dose per patient in each modelled strategy.

| <b>Strategy</b> | <b>Tests</b>          | <b>Avg. dose (MSv)</b> |
|-----------------|-----------------------|------------------------|
| 1               | Ex-ECG -> ECHO -> CA  | 3.9                    |
| 2               | Ex-ECG -> CTA -> CA   | 9.3                    |
| 3               | Ex-ECG -> SPECT -> CA | 9.8                    |
| 4               | Ex-ECG -> CA          | 5.8                    |
| 5               | SPECT -> CA           | 16.4                   |
| 6               | ECHO -> CA            | 6.1                    |
| 7               | ECHO -> CTA -> CA     | 10.2                   |
| 8               | C-MRI -> CA           | 5.7                    |
| 9               | CTA -> CA             | 15.1                   |
| 10              | CA -> ECHO            | 10                     |
| 11              | CA -> SPECT           | 11                     |

Ex-ECG = exercise electrocardiogram; ECHO = stress echocardiogram; SPECT = single-photon emission computed tomography; CTA = computed tomography coronary angiogram; C-MRI = cardiac magnetic resonance; CA = invasive coronary angiography

**Supplementary Figure A: Detailed depiction of model structure**

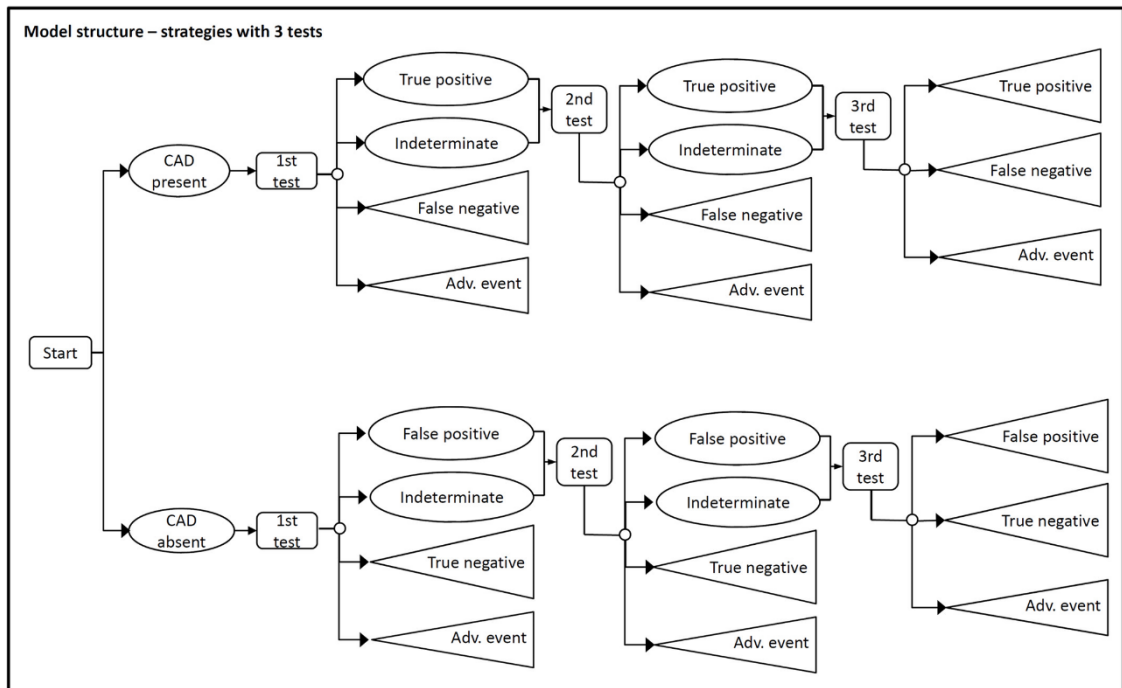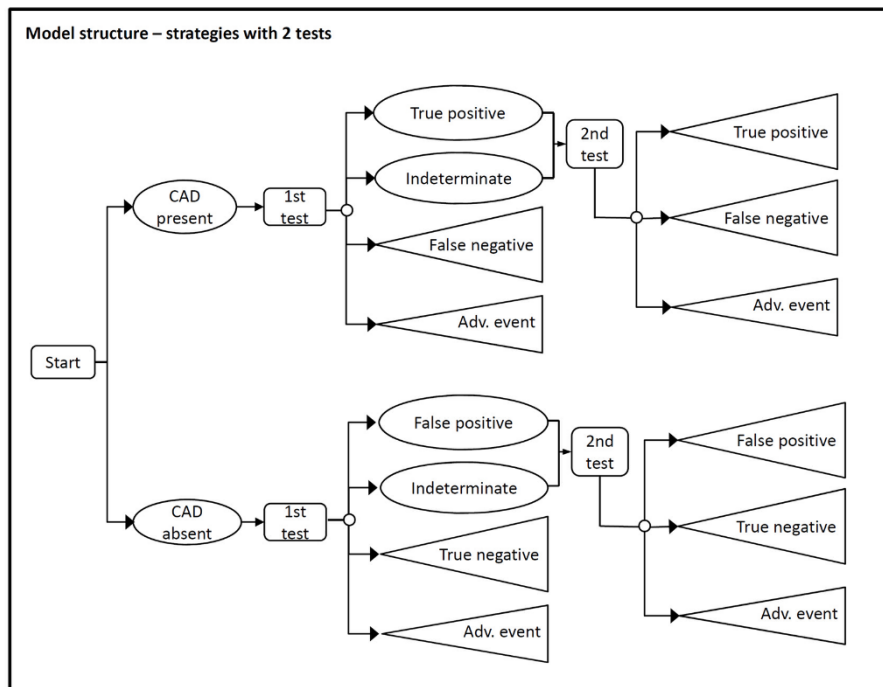

CAD = Coronary artery disease.
